1 **A re-emerging arbovirus in livestock in China: Early genomic**  
2 **surveillance and phylogeographic analysis**

3

4 Shuo Su<sup>1,\*</sup>

5

6 1. Jiangsu Engineering Laboratory of Animal Immunology, Institute of Immunology,  
7 College of Veterinary Medicine, Nanjing Agricultural University, Nanjing, China

8 \*Corresponding author: Shuo Su (shuosu@njau.edu.cn)

9

10 Runing Title: Genomic surveillance and phylogeographic analysis of GETV

11

## 12 **Abstract**

13 Viruses in livestock represent a great risk to public health due to the close contact of  
14 their hosts with humans and the potential long-range transportation through animal trade.  
15 Here, we show how to predict outbreaks of potential zoonotic pathogens and use  
16 spatially-explicit phylogeographic and phylodynamic approaches to provide estimates  
17 of key epidemiological parameters. First, we use metagenomic next generation  
18 sequencing (mNGS) to identify a Getah virus (GETV) as the pathogen responsible for  
19 a re-emerging swine disease in China. The GETV isolate is able to replicate in a variety  
20 of cell lines including human cells and shows high pathogenicity in a mouse model  
21 suggesting a potential public health risk. We obtained 16 complete genomes and 78 E2  
22 gene sequences from viral strains collected within China from 2017 to 2021 through  
23 large-scale surveillance among livestock, pets and mosquitoes. Moreover, phylogenetic  
24 analysis reveals that three major GETV lineages are responsible for the current  
25 epidemic in livestock in China. We identify three potential positively selected sites and  
26 mutations of interest in E2, which may impact the transmissibility and pathogenicity of  
27 the virus. We then reconstruct the evolutionary and dispersal history of the virus and  
28 test the impact of several environmental factors on the viral genetic diversity through  
29 time and on the dispersal dynamic of viral lineages. Of note, we identify temporal  
30 variation in livestock meat consumption as a main predictor of viral genetic diversity  
31 through time. Finally, phylogeographic analyses indicate that GETV preferentially  
32 circulates within areas associated with relatively higher mean annual temperature and  
33 pig population density. Our results highlight the importance of continuous surveillance  
34 of GETV among livestock in southern Chinese regions associated with relatively high  
35 temperatures, and the need to control mosquitoes in the livestock farms. Our analyses  
36 of GETV also provide a baseline for future studies of the molecular epidemiology and  
37 early warning of emerging arboviruses in China.

38 **Key words:** Predict outbreaks of zoonotic pathogens; Getah virus; Genomic

39 surveillance; Next generation sequencing; Phylogeography

## 40 **Introduction**

41 Approximately 18% of emerging infectious diseases (EIDs) that affect humans  
42 originate from wild animals or livestock [1-4]. In many of these host reservoir species,  
43 emerging viruses appear to be well adapted, with little or no evidence of clinical disease.  
44 However, when these viruses spill over into humans, the effects can sometimes be  
45 devastating [5, 6]. Because livestock can often act as a conduit for pathogen spillover  
46 into susceptible human populations, research on emerging viral diseases is focused on  
47 livestock infections that often occur due to contact with wild animals [7]. For example,  
48 the swine industry couples high-density farming with international trade, thus  
49 generating a high risk of emerging virus transmission and the potential for global spread  
50 [8]. Moreover, the swine industry will increasingly represent such risk due to its  
51 constant growth to fulfill a high demand for pork. A disease outbreak caused by a new  
52 or emerging virus may incur substantial economic burden and also endanger human  
53 health due to close human contact with pigs. Pigs have also been shown to be a  
54 significant source of zoonotic viruses such as Nipah virus in Malaysia [9] or influenza  
55 A (H1N1) virus (IAV) that caused the “swine-origin influenza” pandemic [10]. The  
56 2009 A/H1N1 influenza pandemic in Mexico arose from viruses circulating in pigs in  
57 central-west Mexico for more than a decade. The virus originated from Eurasia (the  
58 landmass containing Europe and Asia) owing to an expansion of influenza A virus  
59 diversity in swine resulting from long-distance live swine trade [11]. The importance  
60 of pigs as a source of emerging viruses has recently been illustrated by four cases of  
61 human acute encephalitis that were associated with a variant strain of pseudorabies  
62 virus, with all the patients having had close occupational contact with pigs [12]. An  
63 efficient approach to detect both known and unexpected novel viruses in a single test  
64 would therefore be crucial for emerging viral outbreak identification and management  
65 in swine worldwide.

66 Our ability to predict outbreaks of potential zoonotic pathogens requires an  
67 understanding of their ecology and evolution in reservoir hosts. Metagenomic next-

68 generation sequencing (mNGS) technologies are particularly suitable for identifying  
69 viral etiologies. The analysis of the virome, often referred to as the assemblage of  
70 viruses in metagenomic studies, can detect known and novel viruses in environmental,  
71 human, or animal samples [13, 14]. mNGS is very well-suited for early diagnosis and  
72 monitoring of novel porcine viral diseases due to its high accuracy, fast response  
73 (generating large data in a short amount of time) and high sensitivity [15]. When  
74 coupling the pathogen genomes assembled from mNGS with phylodynamic analyses,  
75 researchers are able to achieve a comprehensive understanding of the spatiotemporal  
76 patterns of spread and how these patterns have been shaped by external factors for  
77 zoonotic pathogens of epidemiological importance. In particular, relatively recent  
78 methodological developments allow for phylodynamic and phylogeographic  
79 approaches to test epidemiological hypotheses. For instance, the skygrid coalescent  
80 model [16] has been extended to allow for testing associations between the evolution  
81 of the virus effective population size through time and time series covariates [17].  
82 Furthermore, discrete [18] or continuous [19, 20] phylogeographic reconstructions can  
83 be exploited to examine how covariates may explain the dispersal process of viral  
84 lineages [21-23]. The combination of mNGS technology and state-of-the-art analytical  
85 methods equips researchers with rapid identification of important emerging viruses and  
86 insight into the important epidemiological and environmental factors that shape its  
87 evolution, spread and hazards, providing a basis for its control and prevention.

88 Since May 2019, more than 1500 piglets died suddenly in four intensive pig farms in  
89 Guangxi, Henan, Hubei and Shandong Provinces, China, but the causal pathogen could  
90 not be identified by conventional diagnostic techniques. Eventually, metagenome  
91 sequencing of tissue samples from diseased piglets in our laboratory linked those cases  
92 to porcine Getah virus. Getah virus (GETV), an arbovirus and a member of the genus  
93 *Alphavirus*, can cause disease in domestic animals, including fever, rashes, edema of  
94 the hindlegs, and lymph node enlargement in horses, while infected piglets exhibit  
95 depression, tremors, hind limb paralysis, diarrhea, high mortality, and abortions [24-  
96 26]. GETV has a linear, positive-sense single stranded RNA genome encoding nine

97 viral proteins (nsP1-nsP4, E1-E3, C, and 6K). E2 is the main glycoprotein that binds to  
98 host cell receptors when initiating cell entry, whereas the E1 glycoprotein is required  
99 for pH-triggered membrane fusion within acidified endosomes [27]. Previous research  
100 shows that GETV gradually evolved within a relative broad host range [28]. Infections  
101 reported in mosquitoes, swine, cattle, horses, and blue foxes [29-32] suggest a wide  
102 distribution of susceptible animals in China. In addition, GETV neutralizing antibodies  
103 were detected in goats, cattle, horses, pigs, other animals [33], and humans [34],  
104 suggesting a potential public health risk. In the past 50 years, numerous *Alphavirus* re-  
105 emergences such as Chikungunya virus (CHIKV) have been documented in Africa and  
106 Asia, with irregular intervals of 2–20 years between outbreaks. These outbreaks led to  
107 many human infections, and even caused severe symptoms or death, as illustrated by  
108 Venezuelan equine encephalitis [35]. Therefore, a sudden outbreak of *Alphaviruses* not  
109 only poses a threat to the breeding industry, but also a potential threat to public health  
110 [36, 37].

111 In this study, we characterize and analyze the GETV outbreak occurring in the Chinese  
112 swine population through next-generation sequencing, an outbreak associated with a  
113 considerable impact on public, veterinary, and livestock health. Because the virus was  
114 only sporadically detected before 2016 in China, we consider this sudden surge in  
115 GETV cases as a re-emerging infectious disease. Therefore, we subsequently performed  
116 large-scale GETV PCR-based screening on previously or recently collected samples  
117 and found a number of GETV cases starting in 2018. We then sequenced and analyzed  
118 the E2 genes of 78 strains (including 16 full genomes) collected from China since 2017  
119 and therefore greatly expanded the existing GETV sequence data. We detailed and  
120 demonstrated the advantages of our new approach in assessment of risk unknown  
121 disease outbreaks, specifically, we aim at (i) genomic surveillance and analyzing amino  
122 acid mutations associated with the ongoing GETV outbreak, (ii) reconstructing the  
123 dispersal history of GETV lineages in continental China, (iii) determining which factors  
124 were related to the dynamics of viral genetic diversity through time, and (iv)  
125 investigating the impact of environmental factors on the dispersal dynamics of GETV

126 lineages.

127

## 128 **Materials and Methods**

### 129 *1. Collection and processing of clinical samples*

#### 130 *1.1. Sample collection from dead piglets of unknown etiology*

131 From May 2019 to September 2020, more than 300 piglet deaths of unknown causes  
132 occurred at several pig farms in Henan, Guangxi, Hubei and Shandong Province, China.  
133 Before the piglets died, they showed clinical symptoms such as diarrhea, wasting,  
134 panting, skin rash, and some neurological symptoms. To investigate the cause of dead  
135 piglets, we collected swabs, feces and tissue samples of dead piglets from these farms.  
136 During the transportation of samples, sufficient cryogenic ice packs were added to the  
137 carrying case to maintain a low temperature environment. Collection of all animal  
138 samples were approved by the Institutional Animal Care and Use Committee of Nanjing  
139 Agricultural University, Nanjing, China (No. SYXK2017-0007).

140

#### 141 *1.2. Sample processing*

142 Further processing of samples was carried out in a biosafety cabinet. Tissue samples  
143 from the lesion area of tissues were cut into small pieces using scissors for surgery and  
144 put in 1.5 ML autoclaved tubes. Sterile PBS buffer solution was added after the fecal  
145 samples and were divided into equal parts. Swab samples could be directly divided into  
146 200 µl for each sterilized tube and stored. All of the samples stored in the laboratory at  
147 -80°C before used.

148

### 149 *2. Pathogen identification and retrospective epidemiological survey*

#### 150 *2.1. Etiology investigation*

151 According to the clinical symptoms of dead piglets, several routine pathogen detections  
152 were implemented on the collected samples, including African swine fever virus  
153 (ASFV), porcine reproductive and respiratory syndrome virus (PRRSV), classical  
154 swine fever virus (CSFV), pseudorabies virus (PRV), porcine epidemic diarrhea virus

155 (PEDV), porcine deltacoronavirus (PDCoV), porcine transmissible gastroenteritis virus  
156 (TGEV), porcine teschovirus (PTV), porcine kobuvirus (PKV), and porcine circovirus  
157 type 2 (PCV2). To further characterize the pathological changes of tissues and organs  
158 in dead piglets, we also performed dissections on the piglets.

159

## 160 *2.2. Next-generation sequencing*

161 Total RNA was extracted using RNA Clean & Concentrator kit (Zymokit), following  
162 the manufacturer's instructions. RNA library was built using TruSeq™ Stranded Total  
163 RNA Sample Preparation Kits from Illumina (San Diego, CA) per protocol. Ribo-  
164 Zero™ rRNA Removal Kits from Illumina (San Diego, CA) were used to remove  
165 Ribosomal RNA. After fragmented, cDNA synthesis, end repair, A-base addition and  
166 Illumina-indexed adaptors ligated, Paired-end (150-bp reads) sequencing of the RNA  
167 library was performed on the Novoseq platform (Illumina).

168

## 169 *2.3. RNA extraction, pathogen screening and retrospective epidemiological survey of* 170 *GETV in China*

171 To further investigate the epidemiological situation of GETV in China, after identifying  
172 the pathogen based on the results of virus isolation and identification and meta-  
173 transcriptome analysis, a retrospective investigation was conducted on samples with  
174 similar clinical symptoms collected between 2018 and 2021. Meanwhile, to explore  
175 GETV host diversity, we also monitored lab samples from pet dogs and cattle collected  
176 over this period. All clinical samples were subsequently screened using primers of  
177 Getah virus (GETV) designed according to the available Getah virus sequences of  
178 GenBank ([www.ncbi.nlm.nih.gov](http://www.ncbi.nlm.nih.gov)). To obtain GETV genome and *Alphavirus* E2  
179 glycoprotein sequences, the sample RNA was extracted using the OMEGA Viral RNA  
180 Isolation Kit (OMEGA, USA), following the manufacturer's instructions strictly.  
181 HiScript II 1st Strand cDNA Synthesis Kit (Vazyme, China) was used for cDNA  
182 Synthesis. Then, polymerase chain reaction was performed with the GETV detection  
183 primers. Samples identified as positive are selected and further conducted amplification

184 reaction with Phanta<sup>®</sup> Max Super-Fidelity DNA Polymerase (Vazyme, China) and a set  
185 of primers for GETV genome amplification designed based on reference genomes.  
186 Subsequently, purified PCR amplification products were sequenced by Sanger dideoxy  
187 chain termination method or the NGS method as described in subsection 2.2.

188

### 189 *3. Biological characterization of re-emerging GETV strains*

190 Two Getah virus (GETV) isolations were performed from Guangxi province and Henan  
191 province. The samples were ground with steel balls under aseptic clean conditions to  
192 homogenize. The homogeneous tissues were centrifuged at 16500g for 10 min. The  
193 supernatant was filtered through a 0.45 $\mu$ m filter (Millipore, USA), diluted 1:10<sup>5</sup> with  
194 Dulbecco's Modified Eagle Medium (DMEM, Gibco, USA), and then inoculated onto  
195 Vero cells cultured in a monolayer. After incubation at 37°C for 1h with 5% CO<sub>2</sub>, the  
196 inoculum was discarded and maintained in fresh DMEM containing 2% (v/v) fetal  
197 bovine serum (FBS, Biological Industries, Israel) and 1% (v/v) penicillin-streptomycin  
198 for 48h. Continuous passage like this, when HN isolate passaged to the 5<sup>th</sup> generation  
199 and GX isolate passaged to the 8<sup>th</sup> generation, a plaque purification assay was  
200 performed to purify the virus. Next, virus isolates were confirmed by Reverse  
201 Transcription Polymerase Chain Reaction (RT-PCR) and indirect immunofluorescence  
202 assay. Then, Virus titration, one-step growth curve determination, immune fluorescence  
203 assay (IFA), and mouse infection test of GETV were detail described in supplementary  
204 materials.

205

### 206 *4. Bioinformatic analyses*

#### 207 *4.1. Genome assembly*

208 For each library, the Trimmomatic program was used to perform adapter removal and  
209 quality trimmed on sequenced reads with the default parameters [38]. Swine and human  
210 genomes were collected from NCBI and indexed using BWA and used to map reads  
211 with the algorithm “mem”[39]. After removing reads mapped to these genomes,  
212 MEGAHIT v1.1.3 was used to assemble the remaining reads [40]. To determine the



213 potential virus contigs, all of assembled contigs were annotated using diamond based  
214 on non-redundant protein database (NR) with 1E-5 E-value cut off. Extracting contigs  
215 which were annotated as “Viruses” on kingdom taxonomy lineage information. To  
216 estimate the relative abundance of each vertebrate-related virus, unmapped reads were  
217 annotated using diamond based on NR databases and we estimated the abundance of  
218 each virus as the number of mapped reads per million total reads (RPM) in each library.  
219

#### 220 *4.2. Analysis of genomic sequences*

221 All available GETV genomic sequences and E2 genes from NCBI GenBank database  
222 ([www.ncbi.nlm.nih.gov](http://www.ncbi.nlm.nih.gov)) up to December 2, 2021, were collected. Some sequences  
223 were removed because (i) they presented duplicated strain names or (ii) corresponded  
224 to cell passages of the same original isolate. A total of 159 E2 genes and 59 genomic  
225 sequences were used for analysis, including 16 newly obtained genomic sequences and  
226 63 additional newly obtained E2 genes (GenBank accession numbers: MZ736724-  
227 MZ736801). E2 is the main protein that mediates virus entry into the host cell during  
228 infection, and it is the key point that affects evade immunity and the ability to spread  
229 infection [28, 41]. Therefore, during the rapid outbreak and early stage of re-emerging  
230 of the virus, we used E2 as molecular markers and preferentially sequenced E2 genes  
231 to understand the evolution and transmission of GETV. We performed multiple  
232 sequence alignment of the genome and E2 genes using MAFFT (version 7.475) [42]  
233 with E-INS-i algorithm, and manually edited the alignment in MEGA (version 7) [43].  
234 Based on the structural and non-structural protein regions of the GETV genome,  
235 statistical analysis of the variable amino acid sites was performed.

236

#### 237 *4.3. Analysis of recombination*

238 We used the program RDP4 4.97 to perform recombination analysis of the genomic  
239 sequences and E2 genes [44]. Seven methods LARD [45], 3Seq [46], GENECONV  
240 [47], SiScan [48], Chimaera [48], MaxChi [49] and RDP [50] were used to detect  
241 recombinant events. We considered that p-values had to be below the 0.05 threshold for

242 at least three of these seven methods to consider the detection of an actual recombinant  
243 event [51].

244

#### 245 *4.4 Characterization of selective pressure.*

246 We used the mixed-effects model of evolution (MEME) [52] algorithm in the Hyphy  
247 software to estimate non-synonymous to synonymous substitution (dN/dS) ratios. The  
248 MEME, single likelihood ancestor counting (SLAC) [53], fast unconstrained Bayesian  
249 approximation (FUBAR) [54] and fixed-effects likelihood (FEL) [53] methods were  
250 used to estimate the positive selected amino acid sites during evolution. The adaptive  
251 branch-site random effects likelihood (aBSREL) method in Hyphy was used to identify  
252 specific branches under positive selection during the evolutionary process [55]. When  
253 a posterior probability  $> 0.95$  or p-value  $< 0.05$  is met, the site was selected as a  
254 potential site; when the criteria of more than 2 method are met, the selected site is  
255 considered undergone positive selection. E2 and E1 protein cartoon structures were  
256 created with PyMol version 2.1.1 from pdb file 3N40 (Fig. 2A, 2C), 2XFB (2B) or  
257 3N41 (2D)[56] which contain the structure of a E1/p62 dimer of CHIKV that shows  
258 relatively high amino acid identity (E1: 60%, E2: 54%) and similarity (E1: 77%, E2:  
259 68%) to E1 and E2 of GETV.

260

### 261 *5. Phylogenetic and phylodynamic analyses*

#### 262 *5.1. Phylogenetic and molecular clock analysis of the genomes and E2 gene sequences*

263 A first phylogenetic analysis of both the genome and E2 gene sequences was performed  
264 with the maximum likelihood method (ML) implemented in RAxML (version  
265 8.2.12)[57] using a general time-reversible nucleotide substitution model with a  
266 discretized gamma distribution among sites (GTR +  $\Gamma$ ) and 1,000 bootstrap replicates.  
267 Temporal signal in our data set was visually assessed using TempEst (1.5.1) [58]. Time-  
268 scaled phylogenetic inference was performed using the program BEAST 1.10.4 [59]  
269 with high-performance computing library BEAGLE [60]. We assessed the best fitting  
270 molecular clock model through marginal likelihood estimation (MLE) using path-

271 sampling and stepping-stone estimation approaches. With these approaches, we  
272 identified the relaxed molecular clock with an underlying lognormal distribution as the  
273 best fitting clock model. We specified a GTR+ $\Gamma$  nucleotide substitution model with  
274 three partitions for codon positions, an uncorrelated lognormal relaxed molecular clock,  
275 and a coalescent-based nonparametric skygrid prior for the tree topologies to model the  
276 effective population size over time [16]. Two independent chains with length of  $1 \times 10^8$   
277 iterations converged to indistinguishable posterior distributions. Convergence and  
278 mixing were examined using the program Tracer software 1.7 [61] considering a burn-  
279 in of 10% of the total chain length. All parameter estimates yielded effective sample  
280 sizes over 200. A maximum clade credibility (MCC) tree summary was generated by  
281 TreeAnnotator (1.10.4) and visualized using Figtree 1.4.3  
282 (<http://tree.bio.ed.ac.uk/software/figtree/>).

283

#### 284 *5.2. Testing the impact of environmental factors on the viral diversity through time* 285 *based on the E2 gene*

286 We employed a skygrid- generalized linear model (GLM) coalescent-based model [17]  
287 to examine the relationship through time between the viral effective population size and  
288 several time-varying covariates. The skygrid-GLM posits a log-linear relationship  
289 between the effective population size and a given covariate and enables the inference  
290 of an effect size coefficient that quantifies the relationship. Importantly, under the  
291 skygrid-GLM model, the effective population size and the effect size coefficient that  
292 relates it to a covariate are inferred jointly. This ensures that the effect size coefficient  
293 takes the uncertainty in the effective population size reconstruction into account. Finally,  
294 in the case of a statistically significant relationship between the effective population  
295 size and a covariate, the skygrid-GLM model provides a demographic reconstruction  
296 that is based on genetic sequence data as well as the covariate data (in contrast to  
297 standard coalescent-based approaches that reconstruct the demographic history  
298 exclusively from genetic sequence data). We performed a separate analysis for each of  
299 the following five covariates: annual mean temperature, annual precipitation, forest

300 area, pork production, and per capita meat (pork, beef, mutton) consumption. Annual  
301 mean temperature and annual precipitation were retrieved from the WorldClim 2  
302 database (<https://worldclim.org/>), forest area was taken from the Food and Agriculture  
303 Organization of the United Nations (<http://www.fao.org/home/en/>), and pork  
304 production and per capita meat consumption were collected from the National Bureau  
305 of Statistics of China (<http://www.stats.gov.cn/>).

306

### 307 *5.3. Phylogeographic analyses based on the E2 gene*

308 We performed both discrete [18] and continuous [19] phylogeographic reconstructions,  
309 using the discrete trait and relaxed random walk diffusion models implemented in  
310 BEAST 1.10 [59], respectively, and the BEAGLE 3 library [60] to improve  
311 computational performance. For both kinds of phylogeographic inference, a distinct  
312 reconstruction was performed for each of the two major GETV clades (see below), but  
313 within the same BEAST analysis in order to share the estimation of substitution,  
314 molecular clock, coalescent, and diffusion model parameters. Specifically, we specified  
315 a flexible substitution model with a GTR+ $\Gamma$  parametrization, a relaxed clock model  
316 with rates drawn from an underlying lognormal distribution [62], and a flexible  
317 nonparametric skygrid coalescent model as the tree topology prior [16].

318 For the discrete phylogeographic analysis, we used the GLM extension of the discrete  
319 diffusion model [21] to jointly infer the dispersal history of lineages among discrete  
320 locations as well as the potential contribution of external predictors to the transition  
321 rates between pairs of locations. In other words, such a procedure allows investigating  
322 the potential impact of external factors on the dispersal frequency of GETV lineages  
323 among discrete locations. For each tested predictor, the contribution is estimated by the  
324 GLM coefficient, and the associated statistical support is estimated through the  
325 computation of a Bayes factor. In the context of this study, we treated the provinces of  
326 origin of each sample as discrete locations, and we tested the following predictors using  
327 the GLM approach: geographic distance among provinces (great-circle distance  
328 between province centroid points; kilometers), pig trade among provinces (Ten

329 thousand heads/km<sup>2</sup>) computed for three different time periods (2017-18, 2017-19, and  
330 2020), the number of pigs slaughtered in the province of origin and the province of  
331 destination during two different time periods (2017-18 and 2017-19), the number of  
332 pigs raised in the province of origin and the province of destination during two different  
333 time periods (2017-18 and 2017-19), and the breeding density of pigs (thousand  
334 heads/square kilometer) in the province of origin and the province of destination during  
335 two different time periods (2017-18 and 2017-19). In addition, we also included as  
336 predictors the numbers of sequences sampled at the province of origin and at the  
337 province of destination, which allows to assess the impact of sampling bias on predictor  
338 support [21]. For this analysis, a Markov chain Monte Carlo (MCMC) analysis was ran  
339 for 10<sup>9</sup> iterations while sampling every 5×10<sup>4</sup> iterations and discarding the first 10% of  
340 trees sampled from the posterior distribution as burn-in. Convergence and mixing were  
341 examined using the program Tracer 1.7 [61] and all parameter estimates were associated  
342 with an estimated sampling size (ESS) greater than 200.

343 For the continuous phylogeographic analyses, we used a gamma distribution to model  
344 the among-branch heterogeneity in diffusion velocity. The MCMC was ran for 2×10<sup>9</sup>  
345 iterations while sampling every 10<sup>5</sup> iterations and discarding the first 10% of samples  
346 from the posterior distribution as burn-in. Convergence and mixing were again  
347 examined using Tracer and all parameter estimates were associated with an ESS greater  
348 than 200. MCC trees were summarized using TreeAnnotator 1.10 [59] based on 1,000  
349 trees regularly sampled from the posterior distribution of trees obtained for each of the  
350 two major GETV clades considered here. We used R functions available in the package  
351 “seraphim” [63, 64] to extract the spatio-temporal information embedded within  
352 posterior trees and visualize the dispersal history of GETV lineages and to estimate the  
353 weighted lineage dispersal velocity. We further used “seraphim” to perform post hoc  
354 analyses of the potential impact of continuous environmental factors on the dispersal  
355 location [65] and velocity [66] of viral lineages (Fig. S1): annual mean temperature and  
356 annual precipitation retrieved from the WorldClim 2 database (<https://worldclim.org/>),  
357 the pig population density obtained from the Food and Agriculture Organization

358 database (FAO; <http://www.fao.org/livestock-systems/global-distributions/pigs/>), the  
359 elevation on the study area as estimated by the Shuttle Radar Topography Mission  
360 (<https://www2.jpl.nasa.gov/srtm>), as well as land cover variables (savannas, forests,  
361 croplands, urban areas) extracted from land cover data provided by the International  
362 Geosphere Biosphere Programme (<http://www.igbp.net/>).

363 For investigating the impact of environmental factors on the dispersal location and  
364 dispersal velocity of GETV lineages, we applied analytical approaches developed by  
365 Dellicour et al. (2019) and (2017), respectively (see Supplementary Information for  
366 detailed description of these two approaches).

367

368

## 369 **Results**

### 370 *1. Pathogen identification and retrospective epidemiological survey*

371 All dead pigs in the pig farms of Guangxi, Henan, Hubei and Shandong had suffered  
372 from respiratory, digestive and neural symptoms. Therefore, we performed necropsy of  
373 the pigs and collected the lung, intestinal and other organs for a pathological section as  
374 well as for conventional viral pathogen PCR detection. As shown in Figure 1A, dead  
375 pigs exhibit diarrhea, respiratory and neurological symptoms. The autopsy showed  
376 emphysema of alveoli, swollen mesenteric lymph nodes, and thinned intestinal walls.  
377 None of the common viral pathogens could be identified by PCR, but NGS and  
378 bioinformatics analysis identified GETV as the etiological agent (Fig. 1B). Overall, the  
379 abundance of GETV was the highest among the four infected farms compared to other  
380 viruses, although some GETV positive samples were co-infected with lower  
381 concentrations of Picobirnavirus or Kubovirus. In addition, we examined NGS libraries  
382 obtained in 2016 before the outbreak from the same GETV-positive swine farms in  
383 Guangxi and Shandong provinces, but did not identify any GETV infections. To  
384 determine when GETV had re-emerged and started to spread in China, we used Sanger  
385 sequencing and NGS to retrospectively analyze laboratory samples collected between  
386 2016 and 2021. In addition to the identification of GETV in laboratory-preserved swine

387 samples, it is worth noting that we also detected GETV positive nucleic acid and  
388 sequenced the GETV E2 gene in mosquitoes, and in cattle and dogs. A total of 78  
389 samples from 16 provinces in China were detected to be positive for GETV. Among  
390 them, a total of 16 complete genome (Fig. 1C) sequences were obtained, along with an  
391 additional 62 E2 sequences. In addition to the NCBI sequences, we collected case  
392 reports of GETV-infections from other labs that did not release any sequences (data not  
393 shown). We found that before 2015, there was only one case of swine infection in China,  
394 and that was in Henan province in 2012. Since 2015, the number of GETV cases has  
395 been increasing year by year, including infections of blue foxes and dogs except  
396 livestock, with a wide geographical range of infection (northeast, northwest and the  
397 entire south of China). Since 2017, GETV has expanded rapidly in geographical  
398 distribution, with mammal cases also appearing in Xinjiang (northwest) and northeast  
399 China, but eastern, central and southern China are still the main endemic areas (Fig.  
400 S2A). Of note, when the cases are grouped according to seasons, the results show that  
401 the number in summer (49 cases, accounted for 47.11%) is significantly higher ( $p < 0.05$ )  
402 than in winter (5 cases, 4.81%) (Fig. S2B). This suggests that GETV is more likely to  
403 cause disease during the warmer season, when the virus can replicate in mosquito  
404 vectors.

405

## 406 *2. Biological characterization of re-emerging GETV strains*

407 Two strains of GETV, named HN and GX were isolated by inoculating Vero cells with  
408 intestinal abrasive solution after filtration and plaque purification (Fig. 1D). As shown  
409 in Figures 1E-H, PK15 or Vero cells inoculated with purified GETV-GX or GETV-HN  
410 showed visible cytopathic effect (CPE) in the form of syncytia, rounding and  
411 detachment of cells at 48 hpi as compared to the control. A strong signal was observed  
412 using anti-E2 antibodies in fluorescence microscopy, indicating that PK15 or Vero cells  
413 are effectively infected by GETV-GX or GETV-HN. One-step growth curves  
414 demonstrated efficient virus growth in PK15 and Vero cells with virus titers exceeding  
415  $10^8$  TCID<sub>50</sub>/mL at 48 hpi (Figs. 1I-J).

416 Of note, GETV can replicate in a variety of animal and primate cell lines, including  
417 human cell lines, such as 293T and U251 (Figs. S3A-S3B), which suggests a potential  
418 public health risk and human susceptibility to infection. In addition, GETV-GX was  
419 also shown to be pathogenic in mouse models. GETV-GX was intracranially inoculated  
420 into 3-day-old ICR suckling mice. In the infected group, the weight of the suckling  
421 mice ceased to increase after 24 hours. After 48 hours, some suckling mouse began to  
422 die with hunched back, tremor, and difficulty in eating. All the suckling mice in the  
423 infected group died 80 hours after inoculation (Figs. S3C-S3E).

424

### 425 *3. Sequence, mutation and selection analyses*

426 Analysis of all GETV genomes and E2 genes revealed no recombinant signal. More  
427 than 50 amino acid substitutions were observed between the recently obtained GETV  
428 viruses (data not shown). Here, we focus on 7 amino acid substitutions in E1 and 20  
429 substitutions in E2 relative to a prototype strain, some of which are potential sites under  
430 positive selection. Selection pressure analysis revealed that on overall the GETV E2  
431 gene is under purifying selection (date not shown) and only two amino acid sites, E2-  
432 86 and E2-323, were found to show evidence for positive selection across all three  
433 methods used (FEL, FUBAR, and MEME). In addition, site E2-253 was also found to  
434 be subject to positive selection according to the FUBAR analysis (with probability =  
435 0.986), and we found no evidence for positive selection on any individual lineage on  
436 the GETV phylogeny. The important mutations and potentially positively selected sites  
437 in the ectodomain are highlighted in the crystal structure of the E1/E2 dimer of the  
438 closely related Chikungunya virus [56] (Fig. 2A). The four interesting mutations in E2  
439 are also depicted in the trimeric E1/E2 spike, which is shown as a top view (Fig. 2B).  
440 Residue 323, which is characterized by a conservative Asp to Glu substitution, is  
441 exposed at the surface of the molecule near the membrane. It is thus unlikely to be  
442 involved in receptor binding or act as an antibody epitope; its side chain does not form  
443 contacts with other amino acids. The substitution His86Tyr is located in the central  
444 cavity between E1/E2 dimers, which contains heparan sulfate binding sites in many



445 alphaviruses [67]. The site 207 (Asn207His) is located in a loop at the edge of the spike  
446 and exposed at the cell surface (Fig. 2C). This region contains epitopes for cross-  
447 reactive neutralizing antibodies which compete with binding to the Mxra8 receptor in  
448 other alphaviruses [68, 69]. Residue 253 is located at the base of the viral spike near  
449 E3; the side chain of Lys interacts with Tyr 47 of E3 (Fig. 2D). Furthermore, in close  
450 vicinity of residue 253 are two other basic amino acids, Arg 250 and Lys251, the latter  
451 forms an electrostatic interaction with Asp40 in E3. These amino acids are conserved  
452 in other alphaviruses, but Lys is substituted by Arg in GETV variants.

453

#### 454 *4. Phylogenetic, phylodynamic and phylogeographic analyses*

455 By regressing root-to-tip divergences against sampling times, we confirmed the  
456 presence of temporal signal for both the whole-genome and E2 gene ML tree using  
457 TempEst, with an  $R^2$  of 0.68 and 0.31, respectively. In the absence of clear criteria for  
458 genotyping of GETV, we refrain from providing a formal genotype classification.  
459 However, based on MCC trees that summarize the time-scaled phylogenetic inference  
460 for all genome sequences (Fig. 1C) and E2 sequences (Fig. 2E), we identified 3 lineages  
461 with strong posterior support that are responsible for all viruses sampled after 2000,  
462 which we refer to as lineage I, II and III. Lineage I has few representatives and contains  
463 two mosquito-borne GETV and two swine-borne GETV sequences. Lineage II and III  
464 are responsible for the major epidemic strains from pigs in China and GETV from  
465 mosquitoes, cattle, blue foxes, horses, lesser panda and canines. To infer the time of  
466 emergence of GETV, the time of the most recent common ancestor (TMRCA) of GETV  
467 and of each lineage were estimated based on whole genome and E2 sequences. The  
468 TMRCA was estimated around 1880 (95% highest posterior density (HPD), [1799,  
469 1943]) for the complete genome data set, and around 1904 (95% HPD, [1846, 1947])  
470 for the E2 gene. The estimated TMRCA for the three lineages were 1990 (95% HPD  
471 [1972, 2000]), 1989 (95% HPD [1976, 2000]) and 1986(95% HPD [1979, 1991]),  
472 respectively based on E2. The estimated divergence times for each lineage based on  
473 whole genome sequences were similar to the E2 gene estimates. The mean nucleotide

474 substitution rate (substitutions/site/year) estimated using the whole-genome data set of  
475 GETV was  $3.19 \times 10^{-4}$  substitutions/site/year (95% HPD,  $2.23 \times 10^{-4}$  to  $4.18 \times 10^{-4}$ ) and  
476 using the E2 gene was  $6.26 \times 10^{-4}$  substitutions/site/year (95% HPD,  $4.75 \times 10^{-4}$  to  $7.76$   
477  $\times 10^{-4}$ ). The estimated effective population size of GETV showed that the population  
478 diversity of GETV increased year by year since the first outbreak. In addition, the  
479 population size of GETV reached its peak around 2018 and maintained a high level  
480 until now (Fig. 2F).

481 Next, we employed a phylodynamic approach to investigate which factors may be  
482 associated with the dynamics of GETV genetic diversity through time. The skygrid-  
483 GLM analyses clarify the relationship between the viral effective population size and  
484 five different covariates. In the case of the per capita meat consumption covariate, we  
485 inferred a mean effect size of 0.16 with a 95% Bayesian credibility interval (BCI) of  
486 [0.01, 0.30]. Because the 95% BCI excludes zero, we conclude that the relationship  
487 between the viral effective population size and per capita meat consumption is  
488 statistically significant. On the other hand, all the other skygrid-GLM analyses yielded  
489 95% BCIs that included zero, suggesting that the relationship between the viral  
490 effective population size and each of the four remaining covariates falls short of being  
491 statistically significant (Fig. S4). In particular, for temperature we inferred a mean effect  
492 size of 0.8 with 95% BCI (-0.78, 2.35), for precipitation we inferred a mean effect size  
493 of 0.06 with 95% BCI (-0.12, 0.22), for forest area we inferred a mean effect size of  
494 0.06 with 95% BCI (-0.03, 0.14), and for pork production we inferred a mean effect  
495 size of 0.0004 with 95% BCI (-0.0009, 0.0016).

496 The demographic reconstruction resulting from the skygrid-GLM analysis with the per  
497 capita meat consumption covariate is shown in Figure 3. The white trajectory represents  
498 the mean log viral effective population size and its corresponding 95% BCI region is  
499 shown in light blue. This figure also includes per capita meat consumption (shown as  
500 red line) as well as a standard skygrid demographic reconstruction that is based only on  
501 genetic sequence data (orange mean log effective population size and 95% BCI region

502 in Figure 3, in contrast to the skygrid-GLM reconstruction that is based on sequence  
503 data as well as covariate data. Notably, the mean demographic trajectory inferred by the  
504 skygrid-GLM model more closely follows the trajectory of the covariate. Further, the  
505 light blue 95% BCI region inferred using the skygrid-GLM is narrower than and almost  
506 entirely contained within the orange 95% BCI region inferred using the standard  
507 skygrid. In other words, the skygrid-GLM yields a more precise demographic  
508 reconstruction that is still compatible with the standard skygrid reconstruction. While  
509 meat consumption is certainly not a direct cause of GETV population dynamics, the  
510 consumption of meat, such as cattle, sheep, pigs, will greatly impact the frequency and  
511 volume of livestock transportation and distribution. This may, for instance, lead to  
512 potential contamination of transport vehicles. It is noteworthy that the viral effective  
513 population size has a significant association with per capita meat consumption but does  
514 not have a significant association with pork production. This suggests that pigs are  
515 merely one host for the outbreak and continued epidemic of GETV, and that GETV  
516 population dynamics may be due in part to spillover from other species.

517 The discrete phylogeographic reconstruction coupled with a GLM analysis does not  
518 identify support for particular predictors of the dispersal frequency of GETV lineages  
519 among Chinese provinces, including live swine trade. Indeed, only the sampling sizes  
520 at the province of origin and at the province of destination are associated with Bayes  
521 factor values  $>20$ , which correspond to strong statistical support [70]. Nevertheless, we  
522 found that the Henan province in central China and eastern region in China should be  
523 the one of hubs for GETV spread (Fig. S5).

524 The continuous phylogeographic reconstruction does not allow us to trace the precise  
525 origin of the spread of GETV lineages because the uncertainty associated with the  
526 location inferred for the root of the tree is relatively pronounced (Fig. 4). However, the  
527 reconstructed dispersal history of GETV lineages clearly highlights that some southern  
528 and eastern Chinese provinces (Guangxi, Guangdong, Jiangxi, Fujian, Zhejiang) were  
529 more recently colonized ( $>2015$ ; cfr. yellow nodes in Fig. 4). Taking advantage of the  
530 continuous phylogeographic reconstruction, we have estimated the weighted dispersal

531 velocity of GETV lineages: 151.0 km/year (95% HPD = [110.7-203.2]) when  
532 considering the entire phylogenetic tree, 139.4 km/year (95% HPD = [99.3-192.3])  
533 when only considering phylogenetic branches occurring before 2015, and 157.8  
534 km/year (95% HPD = [112.2-216.3]) when only considering phylogenetic branches  
535 occurring after 2015. While the median value estimated for <2015 is slightly lower than  
536 the median value for >2015, their 95% HPD intervals largely overlap. Similarly, we did  
537 not identify that more recent (>2015) long-distance lineage dispersal events tended to  
538 be associated with relatively higher dispersal velocity (i.e. smaller MCC phylogenetic  
539 branch durations for similar geographic distances travelled by those branches; Fig S6).  
540 We further tested whether lineage dispersal locations tended to be associated with  
541 specific environmental conditions. In practice, we started by computing the E statistic,  
542 which measures the mean environmental values at tree node positions. These values  
543 were extracted from raster (geo-referenced grids) that summarized the different  
544 environmental factors to be tested (Fig. S1). The analyses of the impact of  
545 environmental factors on the dispersal location of viral lineages reveal that GETV  
546 lineages tend to avoid circulating in areas with higher altitude, and to preferentially  
547 circulate within areas associated with relatively higher mean annual temperature and  
548 pig population density (Fig. S1).

549 The analyses of the impact of environmental factors on the dispersal velocity of viral  
550 lineages indicate that none of the environmental variables appears to significantly  
551 impact the dispersal velocity of GETV lineages: when treated either as conductance or  
552 resistance factors and with both path models considered, none of the tested  
553 environmental factor is associated with both a positive  $Q$  distribution and a Bayes factor  
554 support >20. This overall result thus indicates that none of these environmental  
555 variables improve the correlation between branch durations and spatial distances (here  
556 approximated by the environmental distance computed on a uniform “null” raster), this  
557 correlation being already relatively high:  $R^2 = 0.21$  (95% HPD [0.08-0.39]) when  
558 spatial distances are computed with the least-cost path model, and  $R^2 = 0.13$  (95% HPD  
559 [0.04-0.27]) when spatial distances are computed with the Circuitscape path model. In

560 other words, our results reveal that, among the environmental factors that we tested, the  
561 spatial distance remains the best predictor of the duration associated with GETV lineage  
562 dispersal events.

563 **Discussion**

564 Most alphaviruses circulate between specific hematophagous mosquito vectors and  
565 susceptible vertebrate hosts, some of which are major public health threats and result  
566 in disasters to humans upon spillover [71]. GETV is a member of the *Alphavirus* genus,  
567 its pathogenicity for humans is unknown, but there may be a risk of spill-over events to  
568 humans [72]. Up to now, epidemiological surveillance studies and available GETV  
569 sequences from swine have been rare [26, 73, 74]. In this study, we perform a state-of-  
570 the-art genomic surveillance using metagenomic next-generation sequencing coupled  
571 with phylodynamic analyses. We find a high abundance of GETV in dead pig samples  
572 and identify its link to an outbreak among pig herds in China. We show also that GETV  
573 has a broader host range as previously anticipated, which complicates prevention and  
574 control because of its diverse reservoir and multiple hosts. We analyze the genetic  
575 diversity, dispersal history, and the external factors that may impact the spatial spread  
576 of the virus in the early stage of an outbreak/re-emergence in the Chinese pig herd.

577 We highlight that the current emergence GETV can be divided into three main lineages  
578 that primarily evolved and spread in livestock and are geographically widespread.  
579 Interestingly, the relatively strong geographical clustering observed in some early  
580 mosquito sequences may be related to the limited long-distance travel of mosquitoes or  
581 caused by a lack of early sequence samples in livestock, as we found only two lineage  
582 I sequence from swine recently. The results of the selection analysis showed that the E2  
583 gene was on overall subject to purifying selection. This is consistent with the widely  
584 supported “trade-off” hypothesis for mosquito-borne alphaviruses, i.e. alternate  
585 replication in two distinct hosts (vertebrate and invertebrate) limits the evolution of  
586 arboviruses, as enhanced fitness in one host may be detrimental to replication in the  
587 other host [75]. In addition, the estimated nucleotide substitution rate of GETV is  
588 similar to other alphaviruses, such as Ross River virus (RRV) that is most similar to  
589 GETV genetically [76]. Of note, we find some evidence for potential adaptive evolution  
590 or important amino acid mutations such as H86Y, R253K, N207H in the GETV  
591 currently circulating in China. Mapping mutations onto structural models revealed that

592 two sites might affect binding of GETV to negatively charged heparan sulfate (HS).  
593 Different HS-binding sites, basic amino acids, have been identified for equine  
594 encephalitis virus (EEV), peripheral sites at the base and axial sites in the central cavity  
595 of the viral spike [77]. The selected site His86Tyr in E2 of GETV is also exposed to the  
596 central cavity of the viral spike, but the exchange of the weakly basic His by the  
597 uncharged Tyr would rather decrease HS-binding. HS-mediated attachment usually  
598 increases virus replication in cell culture, but, depending on the virus, either increase or  
599 decrease virulence in vivo [67, 78]. The location of the site Lys253Arg corresponds to  
600 a peripheral HS-binding site in EEV [77]. Lysine 253 as well as other basic residues in  
601 the vicinity interact with amino acids in the E3 subunit. After removal of E3, which  
602 detaches from E2 upon virus entry, these basic residues might bind to HS. The K253R  
603 substitution, although conservative might directly affect the HS-interaction.  
604 Alternatively, it could facilitate or hinder the detachment of E3, which is in other  
605 alphaviruses a prerequisite for binding to the cellular receptor and hence for viral  
606 infectivity [68, 69]. The other important mutation, Asn207His is located at the surface  
607 of E2. Epitopes for broadly neutralizing antibodies, which prevent virus attachment to  
608 the Mxra8 receptor are located in the same region [68, 69]. It is unknown whether  
609 GETV uses Mxra8 as entry receptor, but other cellular receptors likely bind to the same  
610 region in E2 [67]. Importantly, previous examples of epidemic-enhancing mutations in  
611 Alphaviruses include CHIKV adaptation to *Ae. albopictus*, and VEEV adaptive  
612 mutations that increase replication in horses [79]. Hence, it is possible that GETV may  
613 have undergone similar adaptive evolution in Chinese mammals that may lead to public  
614 health risk. Therefore, in the wake of the recently sudden outbreak SARS-CoV-2 in  
615 human population from un-known animal origin, our results highlight the importance  
616 of genome surveillance and early warning of emerging infectious diseases in animals.  
617 Moreover, our study has enabled a more robust analysis of GETV evolutionary history  
618 and revealed a more extensive genetic diversity compared to previous analyses [28].  
619 We estimate that the overall genetic diversity of GETV has increased through time since  
620 the first report, which increased the possibility of a large-scale GETV outbreak [80].

621 GETV has a wide geographical distribution in China, especially in the southern region  
622 as well as in areas used for livestock (Fig. S1), which might be related to the distribution  
623 of its mosquito vector. Therefore, we examined the trajectory of GETV effective  
624 population size over time and compared it to a number of different factors that have  
625 been hypothesized to be related to GETV population dynamics. Of note, we found a  
626 statistically significant positive association between the viral effective population size  
627 and per capita livestock meat consumption. This result suggests that it may not simply  
628 be the breeding and trade of swine themselves that caused the GETV outbreak, but  
629 rather that GETV may have been prevalent in other livestock for some time and may  
630 have been partly responsible for causing the outbreak in pigs via mosquitos. This  
631 hypothesis needs to be explored in more detail in future work.

632 Finally, by testing the association between environmental factors and the locations of  
633 lineage dispersal, we demonstrate that, overall, GETV lineages have preferentially  
634 circulated in specific environmental conditions (higher temperature) and in regions with  
635 higher swine population density. In this respect, it is important to note that the highest  
636 mosquito density in China occurs near livestock farms [81] and that GETV incidence  
637 in mammals is significantly higher in summer than in winter. On the other hand,  
638 differential sampling efforts may bias association estimates with environmental factors,  
639 so we take these finds as more suggestive than conclusive. Nonetheless, our results  
640 provide insight into the evolution and diffusion of GETV that may help to prevent and  
641 control GETV infections in livestock. We recommend increased sample collection from  
642 and surveillance of a wider range of species and geographic regions, as uncovering the  
643 transmission routes and major sources of GETV in animals will help prevent future  
644 outbreaks of GETV disease among livestock and emergences in humans.

645

646 Our findings, as alluded to above, should be interpreted in the light of particular  
647 limitations. Uneven sampling may affect our results, and although our pig sampling  
648 covers well the sites we surveille, we may lack a large number of samples from other  
649 sites as well as from other livestock and wildlife animals. Furthermore, our



650 phylogeographic analyses are strongly influenced by the sampling effort, and therefore  
651 remain somehow more descriptive of the environmental conditions associated with the  
652 dispersal locations of inferred viral lineages (Dellicour, et al. 2019).

653 Our research is the first to integrate transcriptomics, genomics, genomic epidemiology  
654 and landscape epidemiology, revealing that the unexplained pig herd deaths were  
655 caused by multiple different lineages of re-emerging GETV in China. Our ability to  
656 predict future pandemics will require intensified viral surveillance and an  
657 understanding of how economic forces and livestock trade policies affect changes in  
658 animal movements and production practices that drive viral emergence. We also  
659 demonstrate that usage of modern technological platforms, such as NGS and  
660 phylogenetic analysis, allows to identify virus outbreaks more rapidly than traditional  
661 methods, such as PCR and virus isolation. Furthermore, our study suggests for the first  
662 time that GETV could have the potential to emerge in human populations, especially in  
663 areas with high temperature and high livestock production in China, due to the  
664 accumulation of mutations and its high genetic diversity and wide host range.

665

#### 666 **Acknowledge**

667 Shuo Su released preprints on behalf of all authors.

668

#### 669 **Reference**

- 670 1. Beigel JH, Farrar J, Han AM, Hayden FG, Hyer R, de Jong MD, et al. Avian influenza A (H5N1)  
671 infection in humans. *N Engl J Med*. 2005;353(13):1374-85. Epub 2005/09/30. doi:  
672 10.1056/NEJMra052211. PubMed PMID: 16192482.
- 673 2. Li W, Shi Z, Yu M, Ren W, Smith C, Epstein JH, et al. Bats are natural reservoirs of SARS-like  
674 coronaviruses. *Science*. 2005;310(5748):676-9. Epub 2005/10/01. doi: 10.1126/science.1118391.  
675 PubMed PMID: 16195424.
- 676 3. Cui J, Li F, Shi ZL. Origin and evolution of pathogenic coronaviruses. *Nat Rev Microbiol*.  
677 2019;17(3):181-92. Epub 2018/12/12. doi: 10.1038/s41579-018-0118-9. PubMed PMID:  
678 30531947; PubMed Central PMCID: PMC7097006.
- 679 4. Wang LF, Anderson DE. Viruses in bats and potential spillover to animals and humans. *Curr*  
680 *Opin Virol*. 2019;34:79-89. Epub 2019/01/22. doi: 10.1016/j.coviro.2018.12.007. PubMed PMID:  
681 30665189; PubMed Central PMCID: PMC7102861.
- 682 5. Sun J, He WT, Wang L, Lai A, Ji X, Zhai X, et al. COVID-19: Epidemiology, Evolution, and Cross-  
683 Disciplinary Perspectives. *Trends Mol Med*. 2020;26(5):483-95. Epub 2020/05/04. doi:

- 684 10.1016/j.molmed.2020.02.008. PubMed PMID: 32359479; PubMed Central PMCID:  
685 PMCPMC7118693.
- 686 6. Zhou P, Yang XL, Wang XG, Hu B, Zhang L, Zhang W, et al. A pneumonia outbreak associated  
687 with a new coronavirus of probable bat origin. *Nature*. 2020;579(7798):270-3. Epub 2020/02/06.  
688 doi: 10.1038/s41586-020-2012-7. PubMed PMID: 32015507; PubMed Central PMCID:  
689 PMCPMC7095418.
- 690 7. He W, Auclert LZ, Zhai X, Wong G, Zhang C, Zhu H, et al. Interspecies Transmission, Genetic  
691 Diversity, and Evolutionary Dynamics of Pseudorabies Virus. *J Infect Dis*. 2019;219(11):1705-15.  
692 Epub 2018/12/28. doi: 10.1093/infdis/jiy731. PubMed PMID: 30590733.
- 693 8. He WT, Ji X, He W, Dellicour S, Wang S, Li G, et al. Genomic Epidemiology, Evolution, and  
694 Transmission Dynamics of Porcine Deltacoronavirus. *Mol Biol Evol*. 2020;37(9):2641-54. Epub  
695 2020/05/15. doi: 10.1093/molbev/msaa117. PubMed PMID: 32407507; PubMed Central PMCID:  
696 PMCPMC7454817.
- 697 9. Ang BSP, Lim TCC, Wang L. Nipah Virus Infection. *J Clin Microbiol*. 2018;56(6). Epub  
698 2018/04/13. doi: 10.1128/JCM.01875-17. PubMed PMID: 29643201; PubMed Central PMCID:  
699 PMCPMC5971524.
- 700 10. Novel Swine-Origin Influenza AVIT, Dawood FS, Jain S, Finelli L, Shaw MW, Lindstrom S, et al.  
701 Emergence of a novel swine-origin influenza A (H1N1) virus in humans. *N Engl J Med*.  
702 2009;360(25):2605-15. Epub 2009/05/09. doi: 10.1056/NEJMoa0903810. PubMed PMID:  
703 19423869.
- 704 11. Mena I, Nelson MI, Quezada-Monroy F, Dutta J, Cortes-Fernandez R, Lara-Puente JH, et al.  
705 Origins of the 2009 H1N1 influenza pandemic in swine in Mexico. *Elife*. 2016;5. Epub 2016/06/29.  
706 doi: 10.7554/eLife.16777. PubMed PMID: 27350259; PubMed Central PMCID: PMCPMC4957980.
- 707 12. Liu Q, Wang X, Xie C, Ding S, Yang H, Guo S, et al. A novel human acute encephalitis caused  
708 by pseudorabies virus variant strain. *Clin Infect Dis*. 2020. Epub 2020/07/16. doi:  
709 10.1093/cid/ciaa987. PubMed PMID: 32667972.
- 710 13. Bragg L, Tyson GW. Metagenomics using next-generation sequencing. *Methods Mol Biol*.  
711 2014;1096:183-201. Epub 2014/02/12. doi: 10.1007/978-1-62703-712-9\_15. PubMed PMID:  
712 24515370.
- 713 14. Miao Q, Ma Y, Wang Q, Pan J, Zhang Y, Jin W, et al. Microbiological Diagnostic Performance  
714 of Metagenomic Next-generation Sequencing When Applied to Clinical Practice. *Clin Infect Dis*.  
715 2018;67(suppl\_2):S231-S40. Epub 2018/11/14. doi: 10.1093/cid/ciy693. PubMed PMID: 30423048.
- 716 15. Kalantar KL, Carvalho T, de Bourcy CFA, Dimitrov B, Dingle G, Egger R, et al. IDseq-An open  
717 source cloud-based pipeline and analysis service for metagenomic pathogen detection and  
718 monitoring. *GigaScience*. 2020;9(10). Epub 2020/10/16. doi: 10.1093/gigascience/giaa111.  
719 PubMed PMID: 33057676; PubMed Central PMCID: PMCPMC7566497.
- 720 16. Gill MS, Lemey P, Faria NR, Rambaut A, Shapiro B, Suchard MA. Improving Bayesian  
721 population dynamics inference: a coalescent-based model for multiple loci. *Mol Biol Evol*.  
722 2013;30(3):713-24. Epub 2012/11/28. doi: 10.1093/molbev/mss265. PubMed PMID: 23180580;  
723 PubMed Central PMCID: PMCPMC3563973.
- 724 17. Gill MS, Lemey P, Bennett SN, Biek R, Suchard MA. Understanding Past Population Dynamics:  
725 Bayesian Coalescent-Based Modeling with Covariates. *Syst Biol*. 2016;65(6):1041-56. Epub  
726 2016/07/03. doi: 10.1093/sysbio/syw050. PubMed PMID: 27368344; PubMed Central PMCID:  
727 PMCPMC5066065.

- 728 18. Lemey P, Rambaut A, Drummond AJ, Suchard MA. Bayesian phylogeography finds its roots.  
729 PLoS Comput Biol. 2009;5(9):e1000520. Epub 2009/09/26. doi: 10.1371/journal.pcbi.1000520.  
730 PubMed PMID: 19779555; PubMed Central PMCID: PMCPMC2740835.
- 731 19. Lemey P, Rambaut A, Welch JJ, Suchard MA. Phylogeography takes a relaxed random walk in  
732 continuous space and time. Mol Biol Evol. 2010;27(8):1877-85. Epub 2010/03/06. doi:  
733 10.1093/molbev/msq067. PubMed PMID: 20203288; PubMed Central PMCID: PMCPMC2915639.
- 734 20. Pybus OG, Suchard MA, Lemey P, Bernardin FJ, Rambaut A, Crawford FW, et al. Unifying the  
735 spatial epidemiology and molecular evolution of emerging epidemics. Proc Natl Acad Sci U S A.  
736 2012;109(37):15066-71. Epub 2012/08/29. doi: 10.1073/pnas.1206598109. PubMed PMID:  
737 22927414; PubMed Central PMCID: PMCPMC3443149.
- 738 21. Lemey P, Rambaut A, Bedford T, Faria N, Bielejec F, Baele G, et al. Unifying viral genetics and  
739 human transportation data to predict the global transmission dynamics of human influenza H3N2.  
740 PLoS Pathog. 2014;10(2):e1003932. Epub 2014/03/04. doi: 10.1371/journal.ppat.1003932.  
741 PubMed PMID: 24586153; PubMed Central PMCID: PMCPMC3930559.
- 742 22. Jacquot M, Nomikou K, Palmarini M, Mertens P, Biek R. Bluetongue virus spread in Europe is  
743 a consequence of climatic, landscape and vertebrate host factors as revealed by phylogeographic  
744 inference. Proc Biol Sci. 2017;284(1864). Epub 2017/10/13. doi: 10.1098/rspb.2017.0919. PubMed  
745 PMID: 29021180; PubMed Central PMCID: PMCPMC5647287.
- 746 23. Bruncker K, Lemey P, Marston DA, Fooks AR, Lugelo A, Ngeleja C, et al. Landscape attributes  
747 governing local transmission of an endemic zoonosis: Rabies virus in domestic dogs. Mol Ecol.  
748 2018;27(3):773-88. Epub 2017/12/24. doi: 10.1111/mec.14470. PubMed PMID: 29274171;  
749 PubMed Central PMCID: PMCPMC5900915.
- 750 24. Rawle DJ, Nguyen W, Dumenil T, Parry R, Warrilow D, Tang B, et al. Sequencing of Historical  
751 Isolates, K-mer Mining and High Serological Cross-Reactivity with Ross River Virus Argue against  
752 the Presence of Getah Virus in Australia. Pathogens. 2020;9(10). Epub 2020/10/22. doi:  
753 10.3390/pathogens9100848. PubMed PMID: 33081269; PubMed Central PMCID:  
754 PMCPMC7650646.
- 755 25. Kumanomido T, Wada R, Kanemaru T, Kamada M, Hirasawa K, Akiyama Y. Clinical and  
756 virological observations on swine experimentally infected with Getah virus. Vet Microbiol.  
757 1988;16(3):295-301. Epub 1988/03/01. doi: 10.1016/0378-1135(88)90033-8. PubMed PMID:  
758 2836997.
- 759 26. Xing C, Jiang J, Lu Z, Mi S, He B, Tu C, et al. Isolation and characterization of Getah virus from  
760 pigs in Guangdong province of China. Transboundary and emerging diseases. 2020. Epub  
761 2020/04/12. doi: 10.1111/tbed.13567. PubMed PMID: 32277601.
- 762 27. Zhai YG, Wang HY, Sun XH, Fu SH, Wang HQ, Attoui H, et al. Complete sequence  
763 characterization of isolates of Getah virus (genus Alphavirus, family Togaviridae) from China. J Gen  
764 Virol. 2008;89(Pt 6):1446-56. Epub 2008/05/14. doi: 10.1099/vir.0.83607-0. PubMed PMID:  
765 18474561.
- 766 28. Li YY, Liu H, Fu SH, Li XL, Guo XF, Li MH, et al. From discovery to spread: The evolution and  
767 phylogeny of Getah virus. Infect Genet Evol. 2017;55:48-55. Epub 2017/08/23. doi:  
768 10.1016/j.meegid.2017.08.016. PubMed PMID: 28827175.
- 769 29. Liu H, Zhang X, Li LX, Shi N, Sun XT, Liu Q, et al. First isolation and characterization of Getah  
770 virus from cattle in northeastern China. BMC veterinary research. 2019;15(1):320. Epub 2019/09/07.  
771 doi: 10.1186/s12917-019-2061-z. PubMed PMID: 31488162; PubMed Central PMCID:

- 772 PMCPMC6729113.
- 773 30. Lu G, Ou J, Ji J, Ren Z, Hu X, Wang C, et al. Emergence of Getah Virus Infection in Horse With  
774 Fever in China, 2018. *Frontiers in microbiology*. 2019;10:1416. Epub 2019/07/10. doi:  
775 10.3389/fmicb.2019.01416. PubMed PMID: 31281304; PubMed Central PMCID: PMCPMC6596439.
- 776 31. Li L, Guo X, Zhao Q, Tong Y, Fan H, Sun Q, et al. Investigation on Mosquito-Borne Viruses at  
777 Lancang River and Nu River Watersheds in Southwestern China. *Vector borne and zoonotic  
778 diseases (Larchmont, NY)*. 2017;17(12):804-12. Epub 2017/10/31. doi: 10.1089/vbz.2017.2164.  
779 PubMed PMID: 29083983.
- 780 32. Shi N, Li LX, Lu RG, Yan XJ, Liu H. Highly Pathogenic Swine Getah Virus in Blue Foxes, Eastern  
781 China, 2017. *Emerging infectious diseases*. 2019;25(6):1252-4. Epub 2019/05/21. doi:  
782 10.3201/eid2506.181983. PubMed PMID: 31107236; PubMed Central PMCID: PMCPMC6537705.
- 783 33. Li Y, Fu S, Guo X, Li X, Li M, Wang L, et al. Serological Survey of Getah Virus in Domestic  
784 Animals in Yunnan Province, China. *Vector borne and zoonotic diseases (Larchmont, NY)*.  
785 2019;19(1):59-61. Epub 2018/06/30. doi: 10.1089/vbz.2018.2273. PubMed PMID: 29957135.
- 786 34. Doherty RL, Gorman BM, Whitehead RH, Carley JG. Studies of arthropod-borne virus  
787 infections in Queensland. V. Survey of antibodies to group A arboviruses in man and other animals.  
788 *The Australian journal of experimental biology and medical science*. 1966;44(4):365-77. Epub  
789 1966/08/01. doi: 10.1038/icb.1966.35. PubMed PMID: 6007741.
- 790 35. Taylor KG, Paessler S. Pathogenesis of Venezuelan equine encephalitis. *Vet Microbiol*.  
791 2013;167(1-2):145-50. Epub 2013/08/24. doi: 10.1016/j.vetmic.2013.07.012. PubMed PMID:  
792 23968890.
- 793 36. Lu G, Chen R, Shao R, Dong N, Liu W, Li S. Getah virus: An increasing threat in China. *J Infect*.  
794 2020;80(3):350-71. Epub 2019/12/04. doi: 10.1016/j.jinf.2019.11.016. PubMed PMID: 31790706.
- 795 37. Suhrbier A. Rheumatic manifestations of chikungunya: emerging concepts and interventions.  
796 *Nat Rev Rheumatol*. 2019;15(10):597-611. Epub 2019/09/05. doi: 10.1038/s41584-019-0276-9.  
797 PubMed PMID: 31481759.
- 798 38. Bolger AM, Lohse M, Usadel B. Trimmomatic: a flexible trimmer for Illumina sequence data.  
799 *Bioinformatics*. 2014;30(15):2114-20. Epub 2014/04/04. doi: 10.1093/bioinformatics/btu170.  
800 PubMed PMID: 24695404; PubMed Central PMCID: PMCPMC4103590.
- 801 39. Li H. Aligning sequence reads, clone sequences and assembly contigs with BWA-MEM. *arXiv:  
802 Genomics*. 2013.
- 803 40. Li D, Liu CM, Luo R, Sadakane K, Lam TW. MEGAHIT: an ultra-fast single-node solution for  
804 large and complex metagenomics assembly via succinct de Bruijn graph. *Bioinformatics*.  
805 2015;31(10):1674-6. Epub 2015/01/23. doi: 10.1093/bioinformatics/btv033. PubMed PMID:  
806 25609793.
- 807 41. Tsetsarkin KA, Weaver SC. Sequential adaptive mutations enhance efficient vector switching  
808 by Chikungunya virus and its epidemic emergence. *PLoS Pathog*. 2011;7(12):e1002412. Epub  
809 2011/12/17. doi: 10.1371/journal.ppat.1002412. PubMed PMID: 22174678; PubMed Central  
810 PMCID: PMCPMC3234230.
- 811 42. Katoh K, Standley DM. MAFFT multiple sequence alignment software version 7: improvements  
812 in performance and usability. *Molecular biology and evolution*. 2013;30(4):772-80. Epub  
813 2013/01/19. doi: 10.1093/molbev/mst010. PubMed PMID: 23329690; PubMed Central PMCID:  
814 PMCPMC3603318.
- 815 43. Kumar S, Stecher G, Tamura K. MEGA7: Molecular Evolutionary Genetics Analysis Version 7.0

- 816 for Bigger Datasets. *Mol Biol Evol.* 2016;33(7):1870-4. Epub 2016/03/24. doi:  
817 10.1093/molbev/msw054. PubMed PMID: 27004904; PubMed Central PMCID: PMCPMC8210823.
- 818 44. Martin DP, Murrell B, Golden M, Khoosal A, Muhire B. RDP4: Detection and analysis of  
819 recombination patterns in virus genomes. *Virus evolution.* 2015;1(1):vev003. Epub 2015/05/26. doi:  
820 10.1093/ve/vev003. PubMed PMID: 27774277; PubMed Central PMCID: PMCPMC5014473.
- 821 45. Holmes EC, Worobey M, Rambaut A. Phylogenetic evidence for recombination in dengue  
822 virus. *Molecular biology and evolution.* 1999;16(3):405-9. Epub 1999/05/20. doi:  
823 10.1093/oxfordjournals.molbev.a026121. PubMed PMID: 10331266.
- 824 46. Boni MF, Posada D, Feldman MW. An exact nonparametric method for inferring mosaic  
825 structure in sequence triplets. *Genetics.* 2007;176(2):1035-47. Epub 2007/04/06. doi:  
826 10.1534/genetics.106.068874. PubMed PMID: 17409078; PubMed Central PMCID:  
827 PMCPMC1894573.
- 828 47. Padidam M, Sawyer S, Fauquet CM. Possible emergence of new geminiviruses by frequent  
829 recombination. *Virology.* 1999;265(2):218-25. Epub 1999/12/22. doi: 10.1006/viro.1999.0056.  
830 PubMed PMID: 10600594.
- 831 48. Gibbs MJ, Armstrong JS, Gibbs AJ. Sister-scanning: a Monte Carlo procedure for assessing  
832 signals in recombinant sequences. *Bioinformatics (Oxford, England).* 2000;16(7):573-82. Epub  
833 2000/10/20. doi: 10.1093/bioinformatics/16.7.573. PubMed PMID: 11038328.
- 834 49. Smith JM. Analyzing the mosaic structure of genes. *Journal of molecular evolution.*  
835 1992;34(2):126-9. Epub 1992/02/01. doi: 10.1007/bf00182389. PubMed PMID: 1556748.
- 836 50. Martin D, Rybicki E. RDP: detection of recombination amongst aligned sequences.  
837 *Bioinformatics (Oxford, England).* 2000;16(6):562-3. Epub 2000/09/12. doi:  
838 10.1093/bioinformatics/16.6.562. PubMed PMID: 10980155.
- 839 51. Sabir JS, Lam TT, Ahmed MM, Li L, Shen Y, Abo-Aba SE, et al. Co-circulation of three camel  
840 coronavirus species and recombination of MERS-CoVs in Saudi Arabia. *Science (New York, NY).*  
841 2016;351(6268):81-4. Epub 2015/12/19. doi: 10.1126/science.aac8608. PubMed PMID: 26678874.
- 842 52. Murrell B, Wertheim JO, Moola S, Weighill T, Scheffler K, Kosakovsky Pond SL. Detecting  
843 individual sites subject to episodic diversifying selection. *PLoS Genet.* 2012;8(7):e1002764. Epub  
844 2012/07/19. doi: 10.1371/journal.pgen.1002764. PubMed PMID: 22807683; PubMed Central  
845 PMCID: PMCPMC3395634.
- 846 53. Kosakovsky Pond SL, Frost SD. Not so different after all: a comparison of methods for  
847 detecting amino acid sites under selection. *Mol Biol Evol.* 2005;22(5):1208-22. Epub 2005/02/11.  
848 doi: 10.1093/molbev/msi105. PubMed PMID: 15703242.
- 849 54. Murrell B, Moola S, Mabona A, Weighill T, Sheward D, Kosakovsky Pond SL, et al. FUBAR: a  
850 fast, unconstrained bayesian approximation for inferring selection. *Mol Biol Evol.* 2013;30(5):1196-  
851 205. Epub 2013/02/20. doi: 10.1093/molbev/mst030. PubMed PMID: 23420840; PubMed Central  
852 PMCID: PMCPMC3670733.
- 853 55. Smith MD, Wertheim JO, Weaver S, Murrell B, Scheffler K, Kosakovsky Pond SL. Less is more:  
854 an adaptive branch-site random effects model for efficient detection of episodic diversifying  
855 selection. *Mol Biol Evol.* 2015;32(5):1342-53. Epub 2015/02/24. doi: 10.1093/molbev/msv022.  
856 PubMed PMID: 25697341; PubMed Central PMCID: PMCPMC4408413.
- 857 56. Voss JE, Vaney MC, Duquerroy S, Vornrhein C, Girard-Blanc C, Crublet E, et al. Glycoprotein  
858 organization of Chikungunya virus particles revealed by X-ray crystallography. *Nature.*  
859 2010;468(7324):709-12. Epub 2010/12/03. doi: 10.1038/nature09555. PubMed PMID: 21124458.

- 860 57. Stamatakis A. RAxML version 8: a tool for phylogenetic analysis and post-analysis of large  
861 phylogenies. *Bioinformatics*. 2014;30(9):1312-3. Epub 2014/01/24. doi:  
862 10.1093/bioinformatics/btu033. PubMed PMID: 24451623; PubMed Central PMCID:  
863 PMCPMC3998144.
- 864 58. Rambaut A, Lam TT, Max Carvalho L, Pybus OG. Exploring the temporal structure of  
865 heterochronous sequences using TempEst (formerly Path-O-Gen). *Virus Evol*. 2016;2(1):vew007.  
866 Epub 2016/10/25. doi: 10.1093/ve/vew007. PubMed PMID: 27774300; PubMed Central PMCID:  
867 PMCPMC4989882.
- 868 59. Suchard MA, Lemey P, Baele G, Ayres DL, Drummond AJ, Rambaut A. Bayesian phylogenetic  
869 and phylodynamic data integration using BEAST 1.10. *Virus Evol*. 2018;4(1):vey016. Epub  
870 2018/06/27. doi: 10.1093/ve/vey016. PubMed PMID: 29942656; PubMed Central PMCID:  
871 PMCPMC6007674.
- 872 60. Ayres DL, Cummings MP, Baele G, Darling AE, Lewis PO, Swofford DL, et al. BEAGLE 3:  
873 Improved Performance, Scaling, and Usability for a High-Performance Computing Library for  
874 Statistical Phylogenetics. *Syst Biol*. 2019;68(6):1052-61. Epub 2019/04/30. doi:  
875 10.1093/sysbio/syz020. PubMed PMID: 31034053; PubMed Central PMCID: PMCPMC6802572.
- 876 61. Rambaut A, Drummond AJ, Xie D, Baele G, Suchard MA. Posterior Summarization in Bayesian  
877 Phylogenetics Using Tracer 1.7. *Syst Biol*. 2018;67(5):901-4. Epub 2018/05/03. doi:  
878 10.1093/sysbio/syy032. PubMed PMID: 29718447; PubMed Central PMCID: PMCPMC6101584.
- 879 62. Drummond AJ, Ho SY, Phillips MJ, Rambaut A. Relaxed phylogenetics and dating with  
880 confidence. *PLoS Biol*. 2006;4(5):e88. Epub 2006/05/11. doi: 10.1371/journal.pbio.0040088.  
881 PubMed PMID: 16683862; PubMed Central PMCID: PMCPMC1395354.
- 882 63. Dellicour S, Rose R, Pybus OG. Explaining the geographic spread of emerging epidemics: a  
883 framework for comparing viral phylogenies and environmental landscape data. *BMC*  
884 *Bioinformatics*. 2016;17:82. Epub 2016/02/13. doi: 10.1186/s12859-016-0924-x. PubMed PMID:  
885 26864798; PubMed Central PMCID: PMCPMC4750353.
- 886 64. Dellicour S, Rose R, Faria NR, Lemey P, Pybus OG. SERAPHIM: studying environmental rasters  
887 and phylogenetically informed movements. *Bioinformatics*. 2016;32(20):3204-6. Epub 2016/06/24.  
888 doi: 10.1093/bioinformatics/btw384. PubMed PMID: 27334476.
- 889 65. Dellicour S, Troupin C, Jahanbakhsh F, Salama A, Massoudi S, Moghaddam MK, et al. Using  
890 phylogeographic approaches to analyse the dispersal history, velocity and direction of viral  
891 lineages — Application to rabies virus spread in Iran. *Molecular Ecology*. 2019;28(18):4335-50. doi:  
892 <https://doi.org/10.1111/mec.15222>.
- 893 66. Dellicour S, Rose R, Faria NR, Vieira LFP, Bourhy H, Gilbert M, et al. Using Viral Gene Sequences  
894 to Compare and Explain the Heterogeneous Spatial Dynamics of Virus Epidemics. *Molecular*  
895 *Biology and Evolution*. 2017;34(10):2563-71. doi: 10.1093/molbev/msx176.
- 896 67. Holmes AC, Basore K, Fremont DH, Diamond MS. A molecular understanding of alphavirus  
897 entry. *PLoS Pathog*. 2020;16(10):e1008876. Epub 2020/10/23. doi: 10.1371/journal.ppat.1008876.  
898 PubMed PMID: 33091085; PubMed Central PMCID: PMCPMC7580943 the Scientific Advisory  
899 Board of Moderna. The Diamond laboratory has received unrelated funding under sponsored  
900 research agreements from Vir Biotechnology, Moderna, and Emergent BioSolutions.
- 901 68. Fox JM, Long F, Edeling MA, Lin H, van Duijl-Richter MKS, Fong RH, et al. Broadly Neutralizing  
902 Alphavirus Antibodies Bind an Epitope on E2 and Inhibit Entry and Egress. *Cell*. 2015;163(5):1095-  
903 107. Epub 2015/11/11. doi: 10.1016/j.cell.2015.10.050. PubMed PMID: 26553503; PubMed Central

- 904 PMID: PMCPMC4659373.
- 905 69. Powell LA, Miller A, Fox JM, Kose N, Klose T, Kim AS, et al. Human mAbs Broadly Protect  
906 against Arthritogenic Alphaviruses by Recognizing Conserved Elements of the Mxra8 Receptor-  
907 Binding Site. *Cell Host Microbe*. 2020;28(5):699-711 e7. Epub 2020/08/14. doi:  
908 10.1016/j.chom.2020.07.008. PubMed PMID: 32783883; PubMed Central PMCID:  
909 PMCPMC7666055.
- 910 70. Kass RE, Raftery AE. Bayes Factors. *Journal of the American Statistical Association*.  
911 1995;90(430):773-95. doi: 10.1080/01621459.1995.10476572.
- 912 71. Azar SR, Campos RK, Bergren NA, Camargos VN, Rossi SL. Epidemic Alphaviruses: Ecology,  
913 Emergence and Outbreaks. *Microorganisms*. 2020;8(8):1167. doi:  
914 10.3390/microorganisms8081167. PubMed PMID: 32752150.
- 915 72. Guth S, Hanley KA, Althouse BM, Boots M. Ecological processes underlying the emergence of  
916 novel enzootic cycles: Arboviruses in the neotropics as a case study. *PLoS neglected tropical  
917 diseases*. 2020;14(8):e0008338-e. doi: 10.1371/journal.pntd.0008338. PubMed PMID: 32790670.
- 918 73. Ren T, Mo Q, Wang Y, Wang H, Nong Z, Wang J, et al. Emergence and Phylogenetic Analysis  
919 of a Getah Virus Isolated in Southern China. *Front Vet Sci*. 2020;7:552517. Epub 2020/12/22. doi:  
920 10.3389/fvets.2020.552517. PubMed PMID: 33344520; PubMed Central PMCID: PMCPMC7744783.
- 921 74. Rattanatumhi K, Prasertsincharoen N, Naimon N, Kuwata R, Shimoda H, Ishijima K, et al. A  
922 serological survey and characterization of Getah virus in domestic pigs in Thailand, 2017-2018.  
923 *Transboundary and emerging diseases*. 2021. Epub 2021/02/23. doi: 10.1111/tbed.14042.  
924 PubMed PMID: 33617130.
- 925 75. Althouse BM, Hanley KA. The tortoise or the hare? Impacts of within-host dynamics on  
926 transmission success of arthropod-borne viruses. *Philos Trans R Soc Lond B Biol Sci*.  
927 2015;370(1675). Epub 2015/07/08. doi: 10.1098/rstb.2014.0299. PubMed PMID: 26150665;  
928 PubMed Central PMCID: PMCPMC4528497.
- 929 76. Michie A, Dhanasekaran V, Lindsay MDA, Neville PJ, Nicholson J, Jardine A, et al. Genome-  
930 Scale Phylogeny and Evolutionary Analysis of Ross River Virus Reveals Periodic Sweeps of Lineage  
931 Dominance in Western Australia, 1977-2014. *J Virol*. 2020;94(2). Epub 2019/11/02. doi:  
932 10.1128/JVI.01234-19. PubMed PMID: 31666378; PubMed Central PMCID: PMCPMC6955267.
- 933 77. Chen CL, Hasan SS, Klose T, Sun Y, Buda G, Sun C, et al. Cryo-EM structure of eastern equine  
934 encephalitis virus in complex with heparan sulfate analogues. *Proc Natl Acad Sci U S A*.  
935 2020;117(16):8890-9. Epub 2020/04/05. doi: 10.1073/pnas.1910670117. PubMed PMID: 32245806;  
936 PubMed Central PMCID: PMCPMC7183182.
- 937 78. Button JM, Qazi SA, Wang JC, Mukhopadhyay S. Revisiting an old friend: new findings in  
938 alphavirus structure and assembly. *Curr Opin Virol*. 2020;45:25-33. Epub 2020/07/20. doi:  
939 10.1016/j.coviro.2020.06.005. PubMed PMID: 32683295; PubMed Central PMCID:  
940 PMCPMC7746636.
- 941 79. Brault AC, Powers AM, Holmes EC, Woelk CH, Weaver SC. Positively charged amino acid  
942 substitutions in the e2 envelope glycoprotein are associated with the emergence of venezuelan  
943 equine encephalitis virus. *J Virol*. 2002;76(4):1718-30. Epub 2002/01/19. doi:  
944 10.1128/jvi.76.4.1718-1730.2002. PubMed PMID: 11799167; PubMed Central PMCID:  
945 PMCPMC135911.
- 946 80. Atoni E, Zhao L, Hu C, Ren N, Wang X, Liang M, et al. A dataset of distribution and diversity  
947 of mosquito-associated viruses and their mosquito vectors in China. *Sci Data*. 2020;7(1):342. Epub

948 2020/10/15. doi: 10.1038/s41597-020-00687-9. PubMed PMID: 33051449; PubMed Central  
949 PMCID: PMC7555486.

950 81. Wu H, Lu L, Meng F, Guo Y, QY L. Reports on national surveillance of mosquitoes in China,  
951 2006–2015. *Chin J Vector Biol & Control*. 2017;28(005):409–15.

952

### 953 **Figure Legends**

954 **Figure 1.** Isolation and characterization of Getah virus (GETV). (A) GETV-infected  
955 piglets showing clinical features. From left to right: cyanosis, diarrhea, thinning of the  
956 intestinal wall and lymphadenopathy. (B) The abundance of various viruses at the genus  
957 level in GETV-positive and -negative farms. The relative abundance of each virus in  
958 each library was estimated and normalized by the number of mapped reads per million  
959 total reads (RPM). To remove contaminations, we only show RPM above 1. Guangxi-  
960 2019, Henan-2020, Shandong-2019 and Hubei-2019: GETV positive farms. Guangxi-  
961 2016 and Shandong- 2016 corresponded to the two farms that were GETV-positive in  
962 2019. (C) Maximum clade credibility tree of GETV based on whole genome sequences.  
963 Red squares represent new sequences obtained in this study. The sampling location and  
964 the host are color-coded. (D) GETV was successfully isolated and verified by agarose  
965 gel electrophoresis. (E-F) Vero were infected with GETV-GX or GETV-HN  
966 (MOI=0.001) and PK15 cells were infected with GETV-GX or GETV-HN (MOI=0.1).  
967 Cytopathic changes was observed at 12, 24, 36, 48, 60 and 72 hpi. (G-H)  
968 Immunofluorescence of GETV-E2 (green) detected in infected Vero or PK15 cells,  
969 respectively, Nuclei are stained blue with DAPI. All fluorescent images were taken at  
970 20×magnification. (I-J) Growth of GETV-GX or GETV-HN in Vero (I) and PK15 (J)  
971 cultures. Viral titers were determined for samples (only medium) between 12 and 72  
972 hpi in Vero cells. Data are expressed as mean ±S.D. of viral titers (lg10 TCID<sub>50</sub> per  
973 0.1ml) derived from three infected cell cultures.

974

975 **Figure 2.** Location of amino acid substitutions and selected sites in E2 of GETV  
976 variants. (A): Structure of a heterodimer containing the E1 (green cartoon) and E2 (blue)  
977 subunit. The small E3 subunit (magenta cartoon) is still associated with E2. Amino acid  
978 exchanges are highlighted as red spheres. The horizontal line symbolizes the viral



979 membrane, in which both proteins are anchored by a transmembrane region. FL =  
980 fusion loop in E1. (B) Top view of a hexameric spike composed of three E1 (green  
981 cartoon) and three E2 (blue) subunits. Positively selected and other interesting sites in  
982 E2 are highlighted as red spheres. (C) Detail of the E2 structure in a semitransparent  
983 surface projection showing location of residue 207 as red stick. Epitopes for antibodies  
984 that prevent binding of alphaviruses to the Mxra8 receptor are shown as orange sticks  
985 [69] and for other broadly neutralizing antibodies as wheat sticks [68]. (D) Detail of the  
986 interface of E2 (blue) with E3 (green) showing the location of the selected site 253 as  
987 a stick. K253 interacts with Tyr 47 in the E3 subunit. Shown as sticks are also two other  
988 basic amino acids in the vicinity, one of them (R250) forms an ionic interaction with  
989 D40 in E3. After removal of E3 during virus entry, the three basic amino acids might  
990 form a heparan sulphate (HS) binding site. The conservative exchange K253R might  
991 affect HS-binding or removal of E3. The figures were created with PyMol from pdb-  
992 files 3N40 (a,c,d) or 2XFB (b) (E) Maximum clade credibility tree (MCC) of GETV E2  
993 gene obtained from time-scaled phylogenetic inference. F) the effective population size  
994 over time of GETV E2 gene with an uncorrelated lognormal relaxed molecular clock,  
995 and a coalescent-based nonparametric skygrid prior for the tree topologies.

996

997 **Figure 3.** Skygrid demographic reconstructions. The dark orange line and shaded light  
998 orange region represent the mean log viral effective population size and its 95%  
999 Bayesian credibility interval (BCI) region, respectively, inferred using a standard  
1000 skygrid analysis of sequence data. The white line and shaded light blue region represent  
1001 the mean log viral effective population size and its 95% BCI region, respectively,  
1002 inferred using a skygrid-GLM analysis of sequence data and per capita meat (pork, beef,  
1003 mutton) consumption covariate data. The per capita meat consumption is shown in red.  
1004 The skygrid-GLM analysis yields an effect size coefficient with mean 0.16 and 95%  
1005 BCI (0.01, 0.30), indicating a statistically significant association between the viral  
1006 effective population size and per capita meat consumption.

1007

1008 **Figure 4.** Dispersal history of GETV lineages in China: maximum clade credibility  
1009 (MCC) tree and 80% highest posterior density (HPD) regions reflecting the uncertainty  
1010 related to the phylogeographic inference and based on 1,000 trees subsampled from the  
1011 posterior distribution. MCC tree nodes are colored according to their time of occurrence,  
1012 and 80% HPD regions were computed for successive time layers and then  
1013 superimposed using the same color scale reflecting time. In addition to the overall  
1014 continuous phylogeographic reconstruction, we also mapped the dispersal history of  
1015 GETV inferred until three years in the past: 2000, 2007, and 2015, which allows  
1016 visualizing the progression of the virus spread.  
1017

1018 **Supplementary Figures**

1019 **Figure S1.** Continuous environmental variables tested for their impact on the dispersal  
1020 of GETV lineages in China.

1021

1022 **Figure S2.** GETV positive cases bar plots. The bar plot under the x-axis represents the  
1023 number of reported cases of GETV infected mammals in China since 2015. (A) Number  
1024 of GETV cases in seven regions of China over three time periods from 2015-2017,  
1025 2018-2019 and 2020-2021. (B) Number of GETV cases in each season from 2015 to  
1026 2021.

1027

1028 **Figure S3.** Characterization of GETV in cells and suckling mice. (A) 293T or U251  
1029 cells were infected with GETV. At 48 hpi, cytopathic changes were observed. (B)  
1030 Immunofluorescence of GETV Capside protein monoclonal antibody (green) detected  
1031 in infected 293T or U251 cells, respectively, (blue is DAPI). All fluorescent images  
1032 were taken at 20×magnification. (C) Weight of mice after infection with GETV. ICR  
1033 suckling mice (3-day-old) were infected s.c. with 25  $\mu$ L of GETV ( $TCD_{50}=10^{6.5}/100$  ul)  
1034 or with DMEM. The weight of the mice is plotted against the time of infection. (D)  
1035 Survival of mice after infection with GETV. No death was detected after hour 80 PI in  
1036 DMEM group but all the suckling mice in the infected group died after hour 80 PI.  
1037 Survival analysis was performed in GraphPad software. The significance between  
1038 survival of mice infected with GETV and DMEM was estimated using a log rank test;  
1039 \*\*\* $P < 0.001$ . (E) Clinic symptoms of mice after infect of GETV.

1040

1041 **Figure S4.** Comparison of skygrid viral effective population size reconstruction with  
1042 time-varied covariates. Each plot depicts the mean effective population size trajectory  
1043 (dark blue), its corresponding 95% Bayesian credibility interval region (light blue), and  
1044 a time-varying covariate (dark red). (A)The covariates are: annual forest area, (B)  
1045 annual precipitation, (C) annual pork production, (D) and annual mean temperature.

1046

1047 **Figure S5.** Analysis of lineage dispersal events associated with the maximum clade  
1048 credibility tree obtained from the continuous phylogeographic inference.

1049

1050

1051

Figure 1

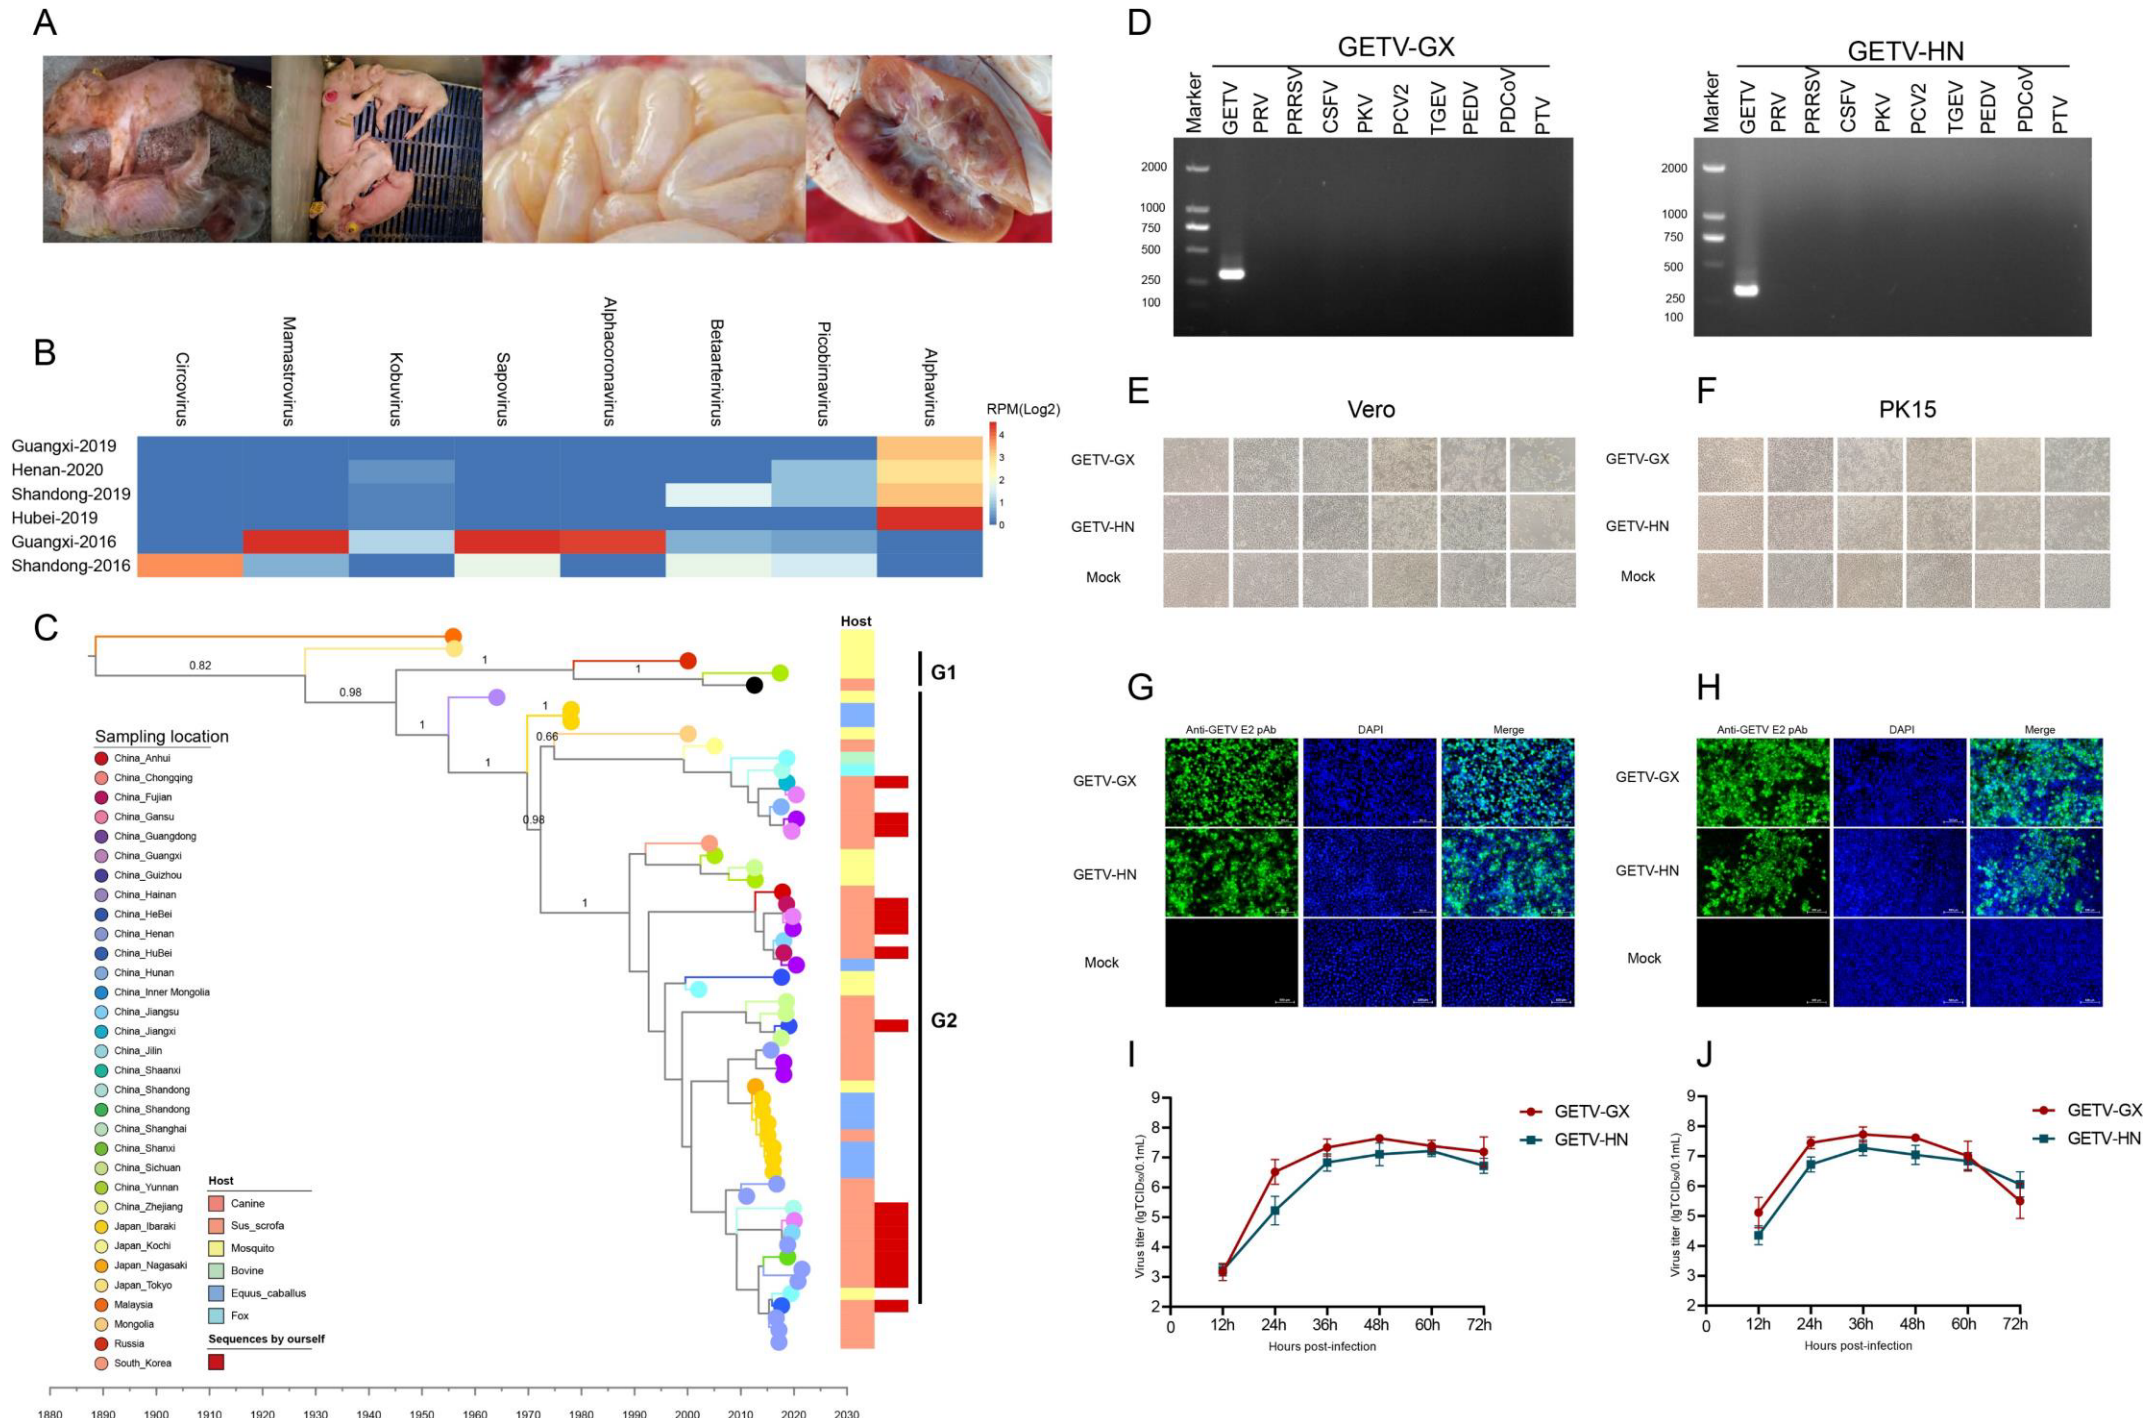

Figure 2

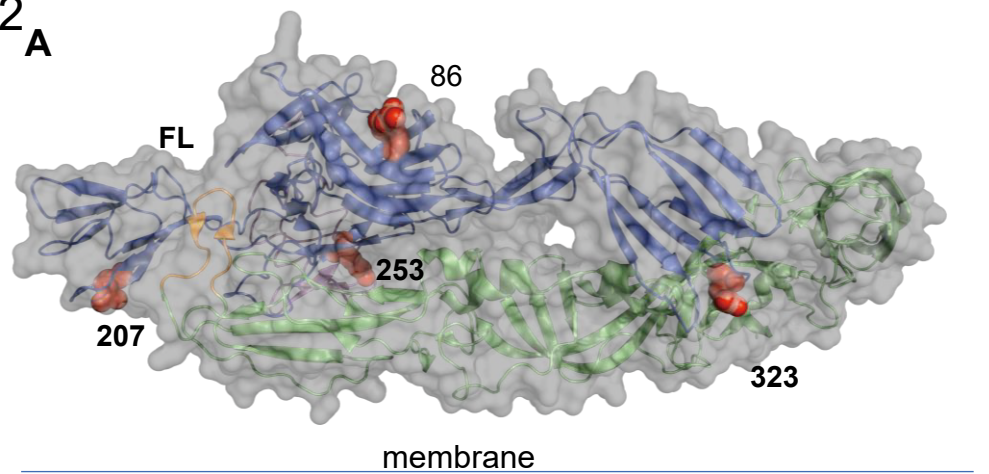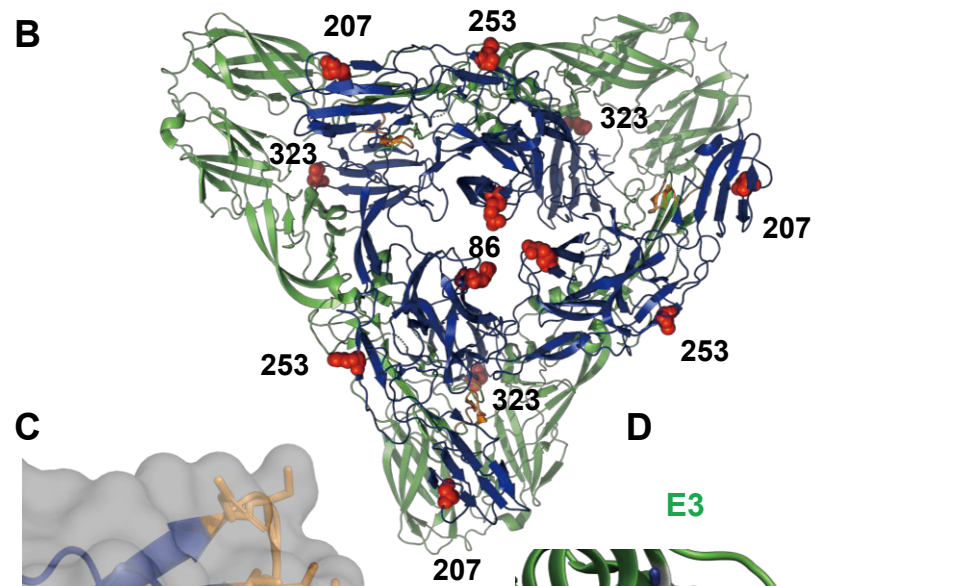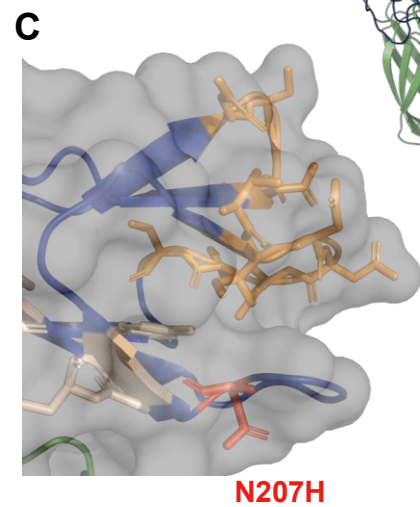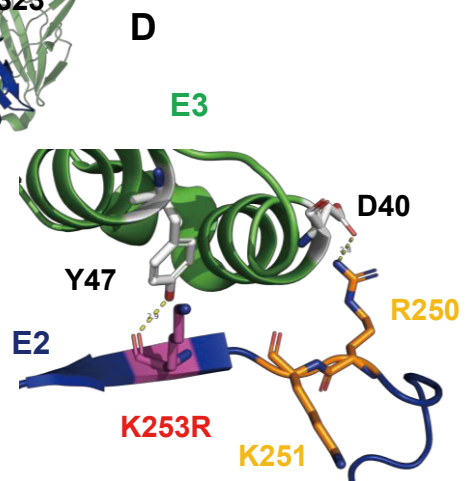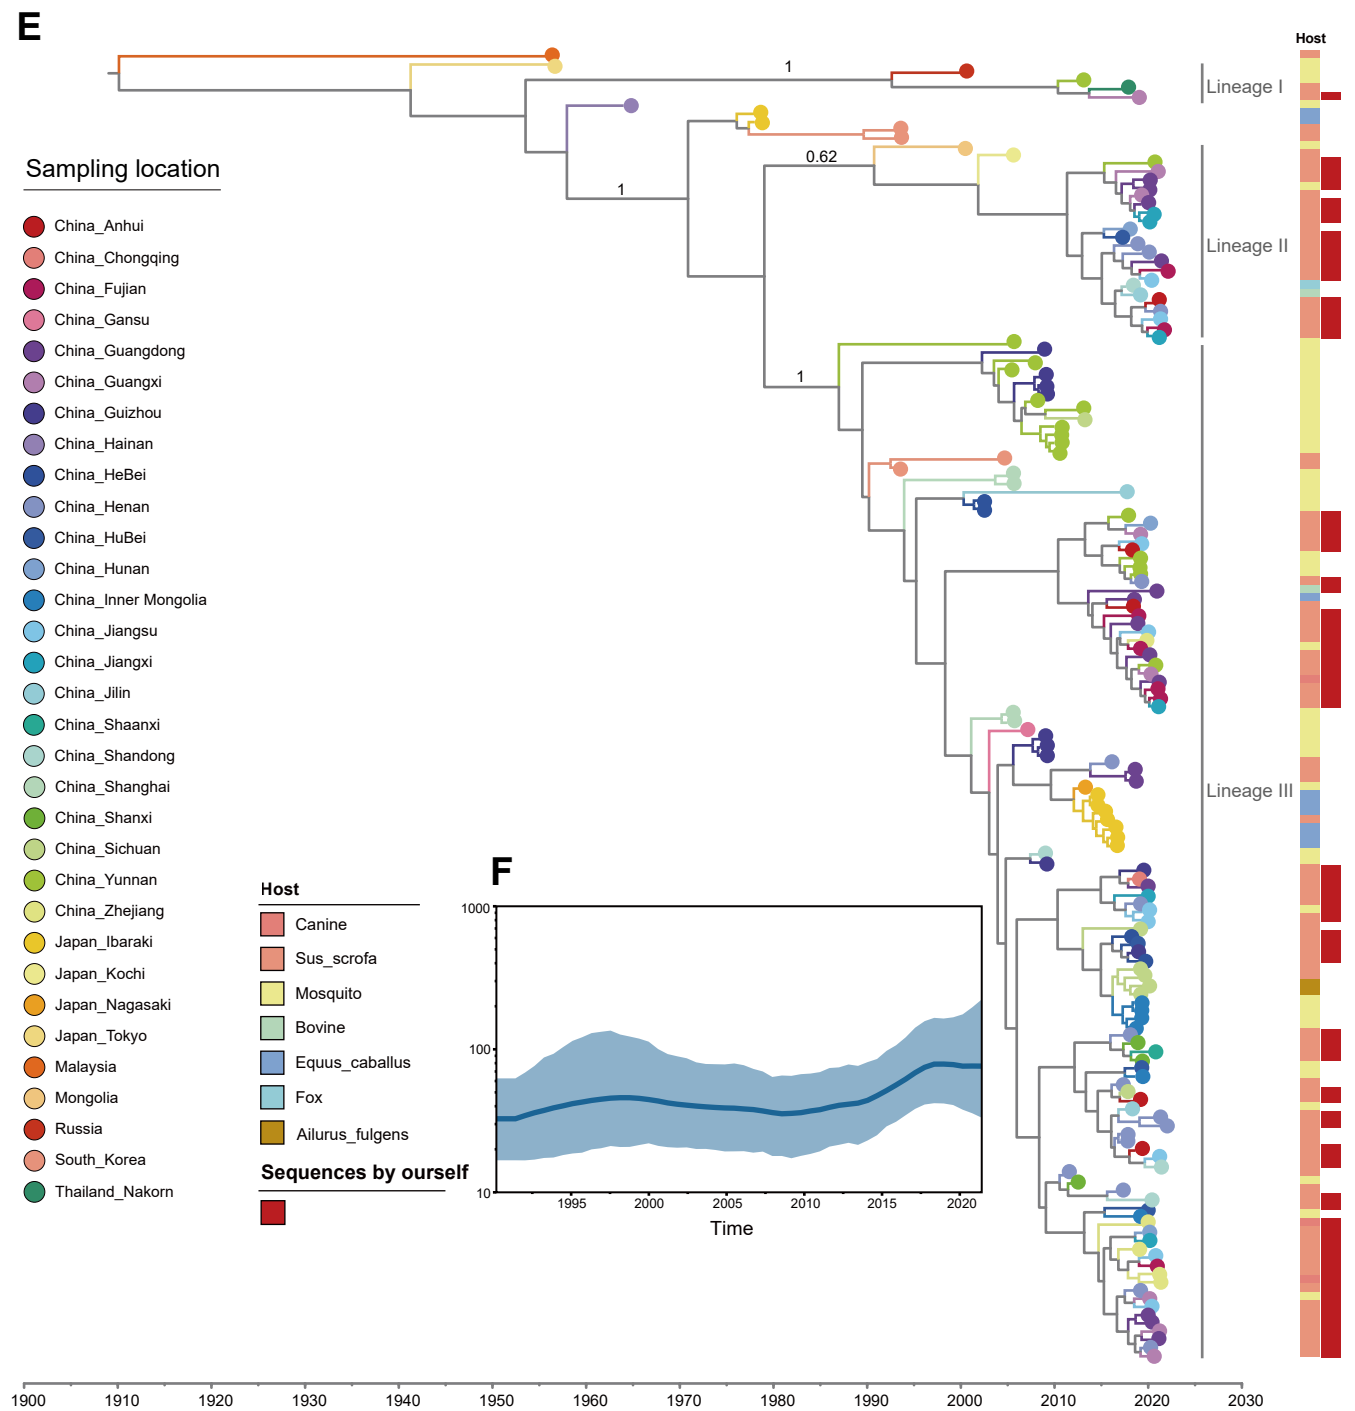

Figure 3

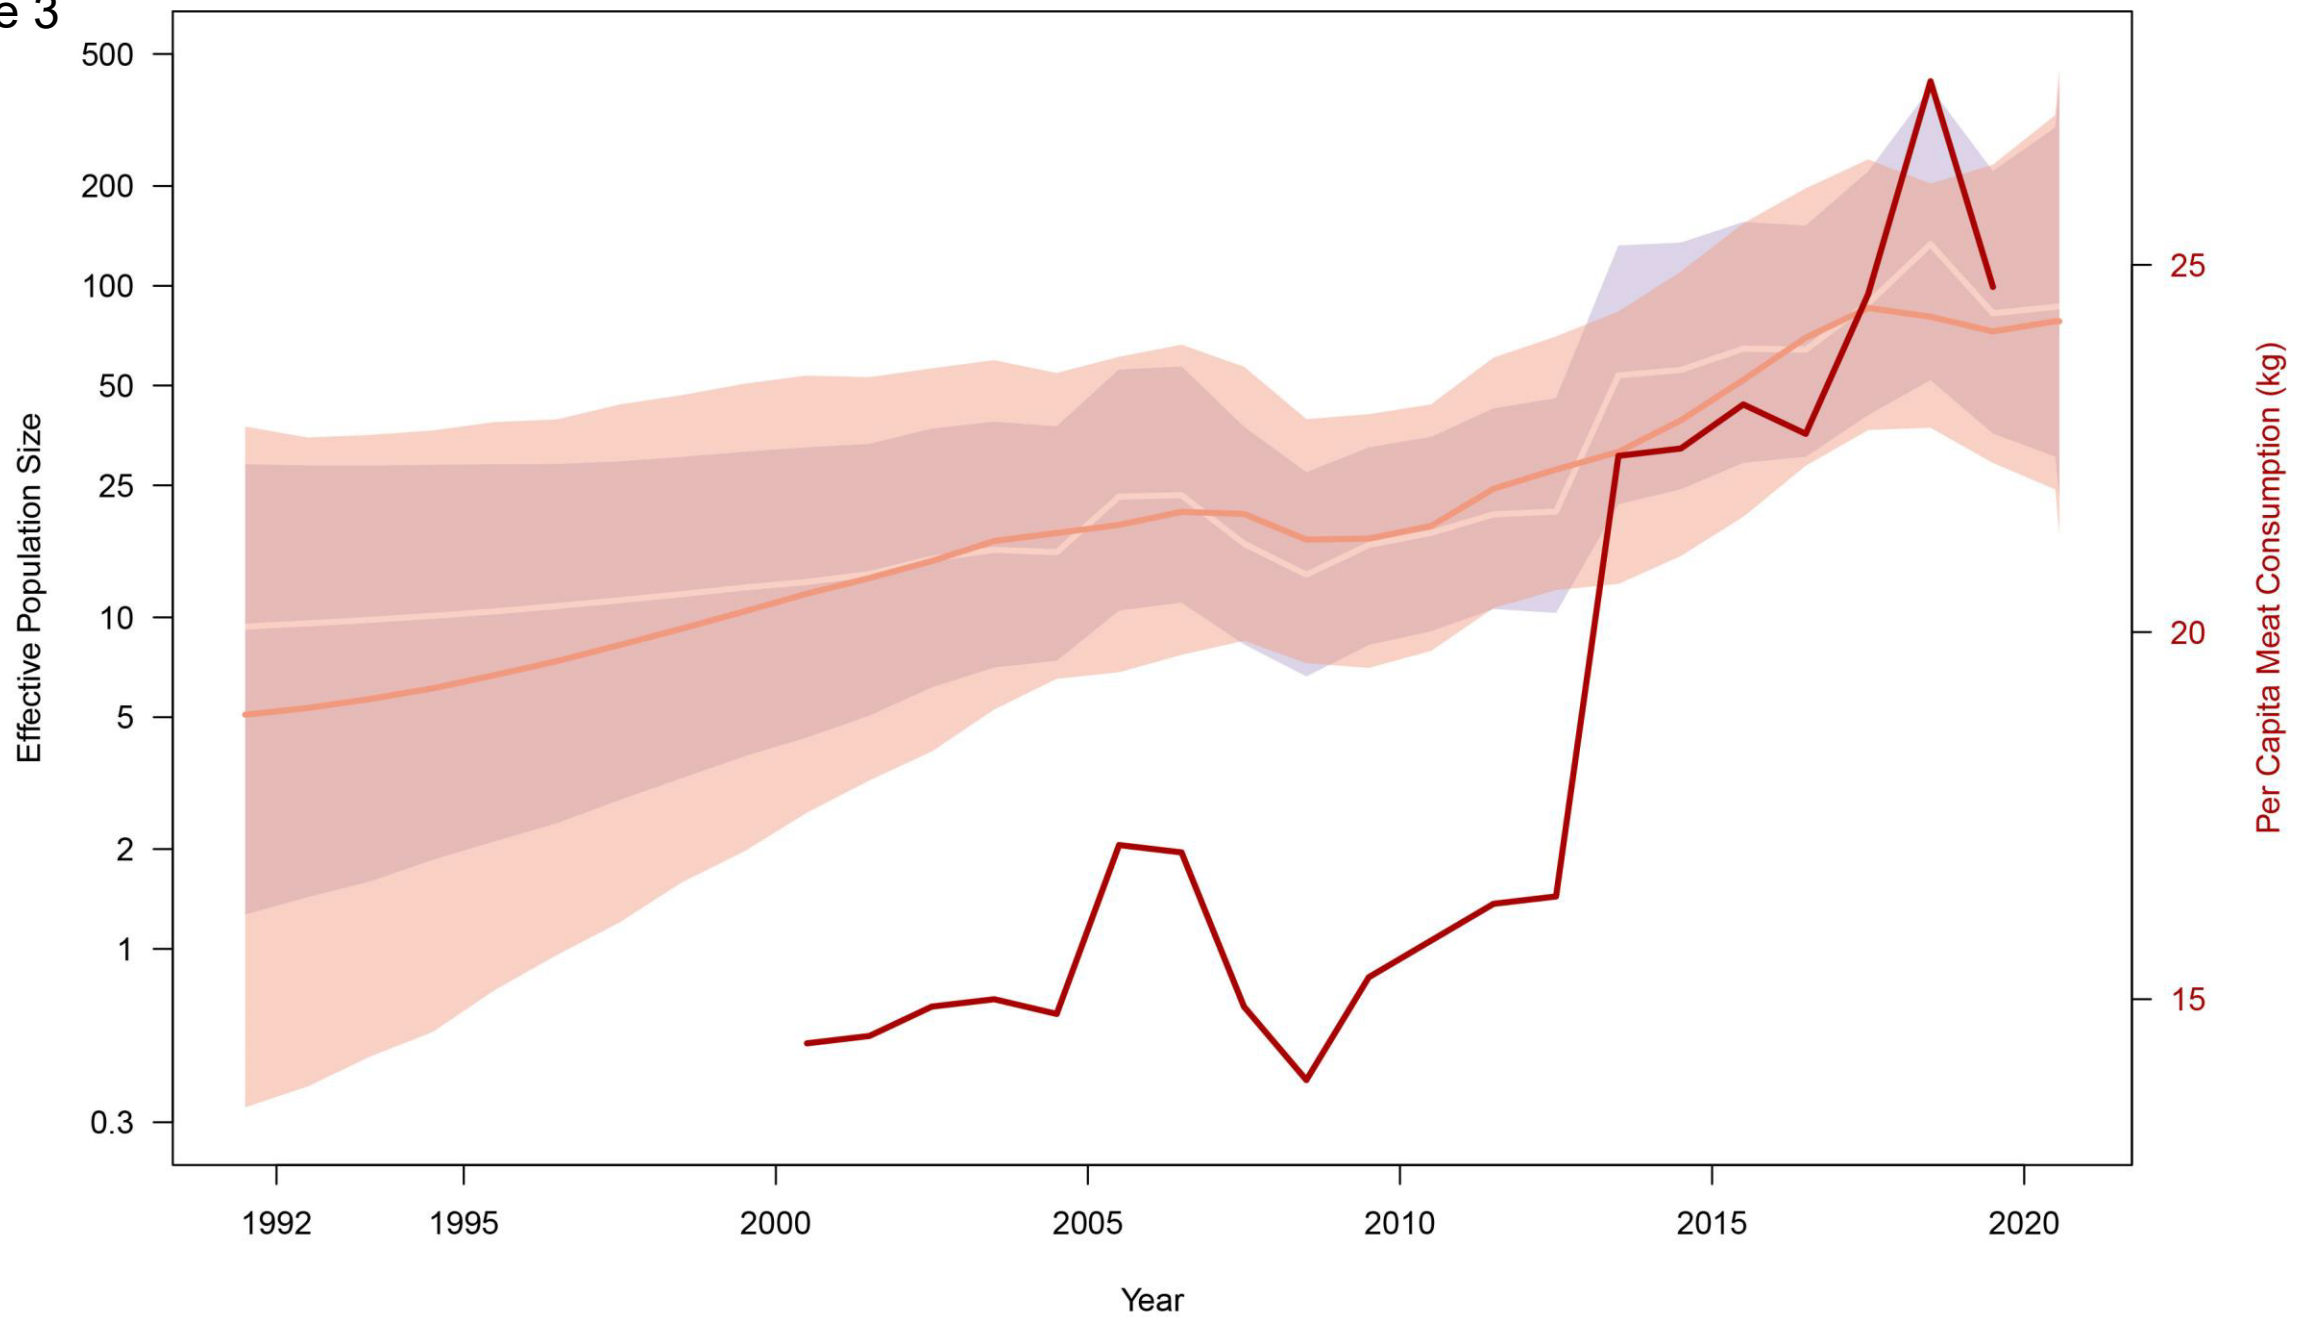

Figure 4

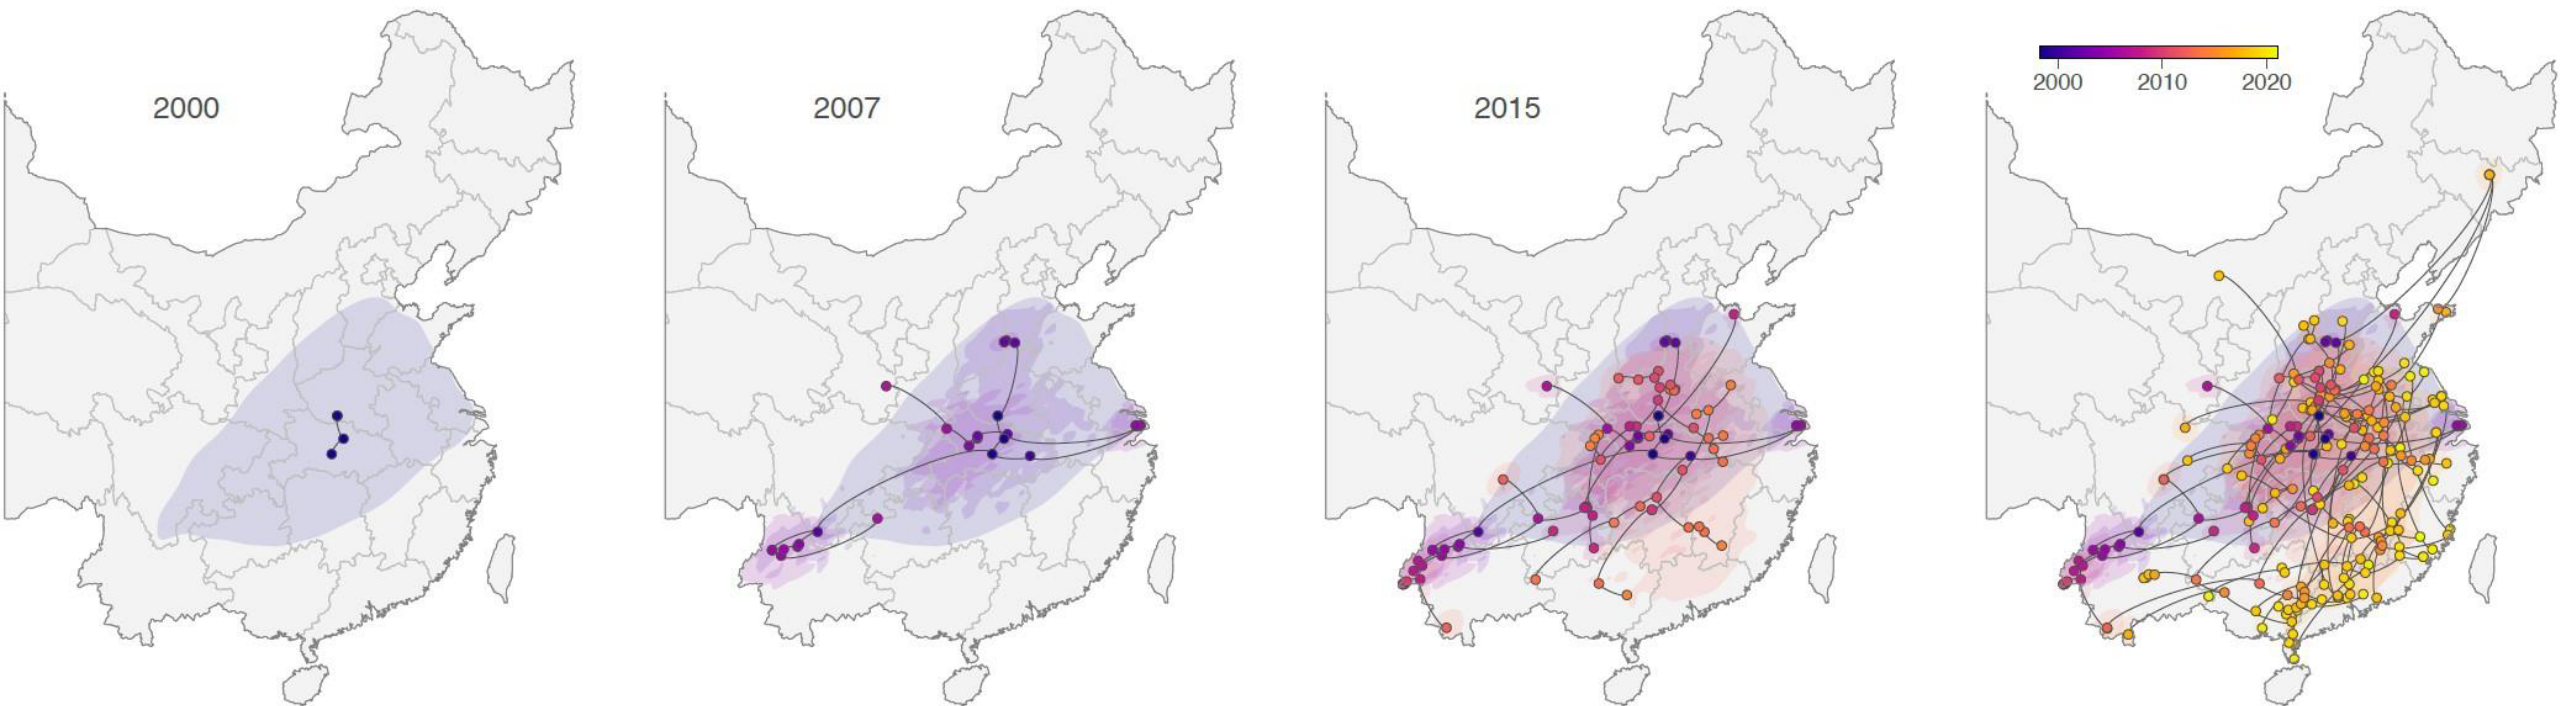



Figure S1

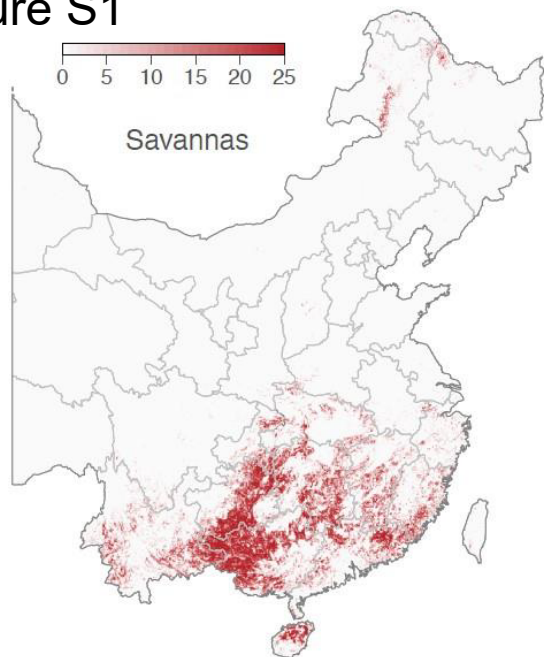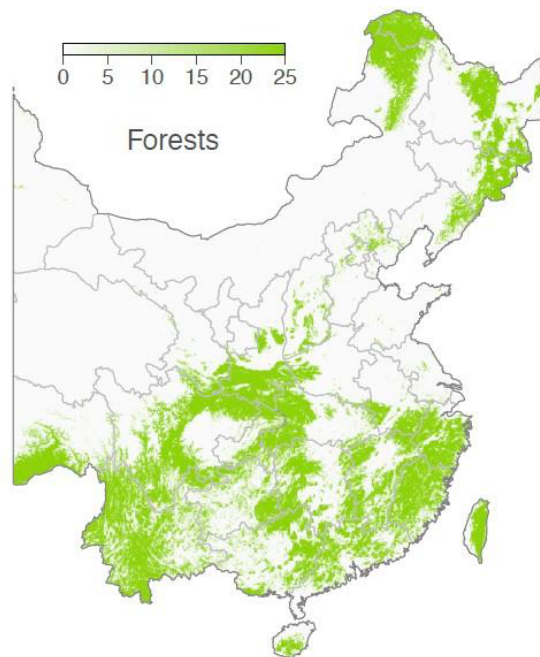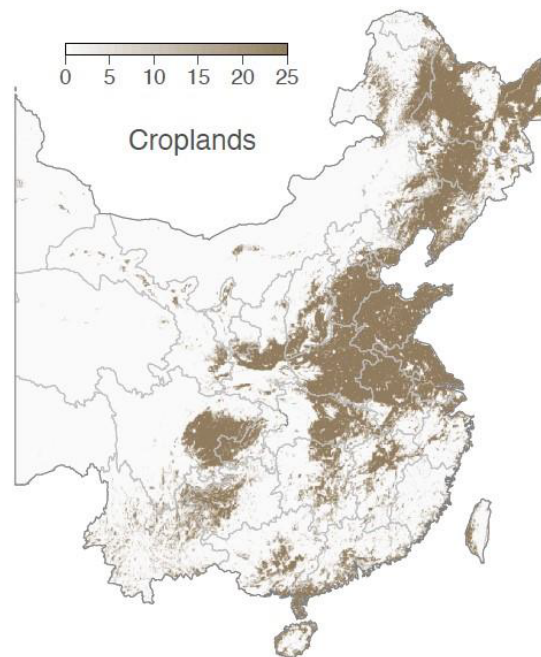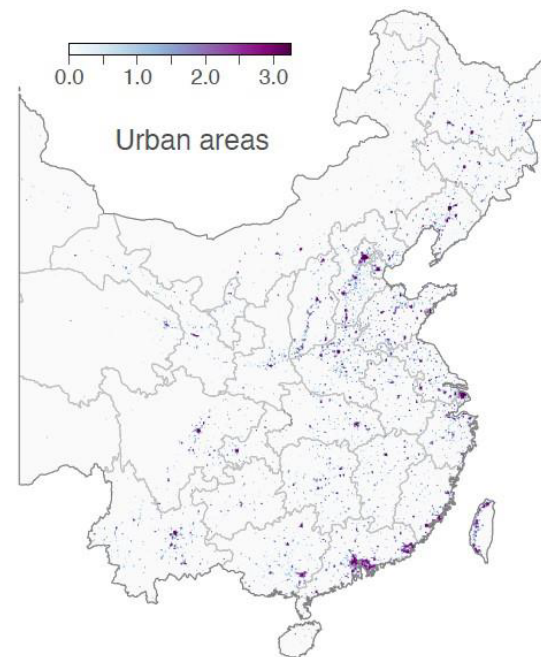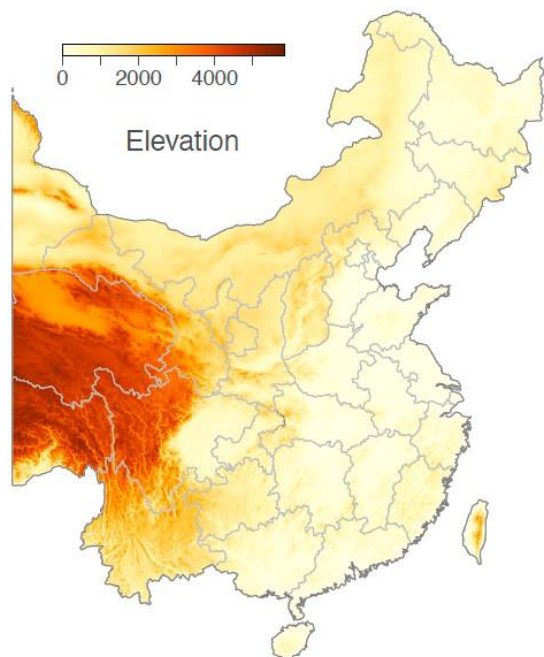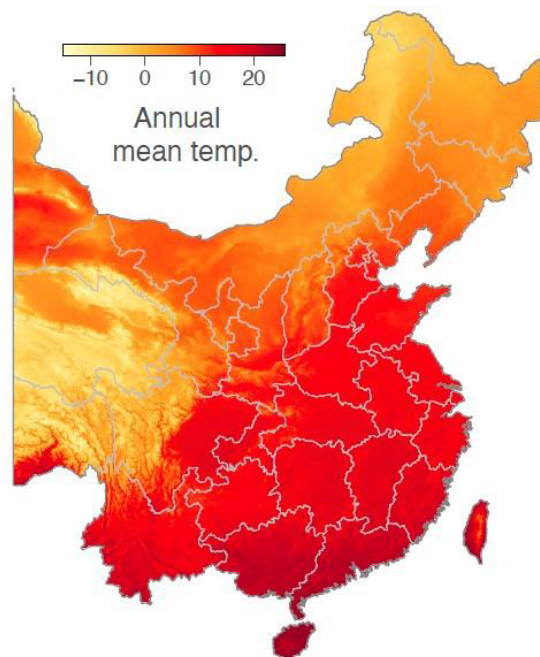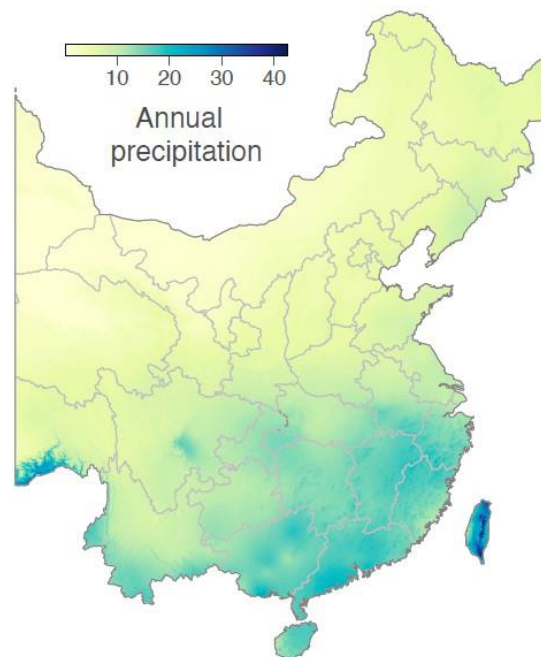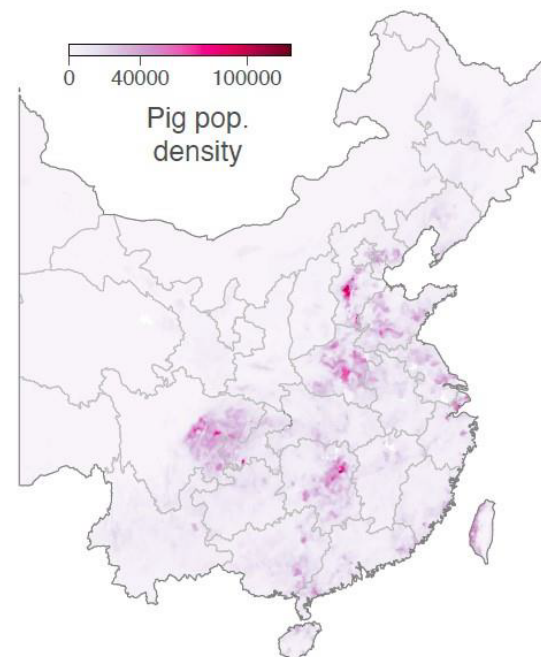

Figure S2

A

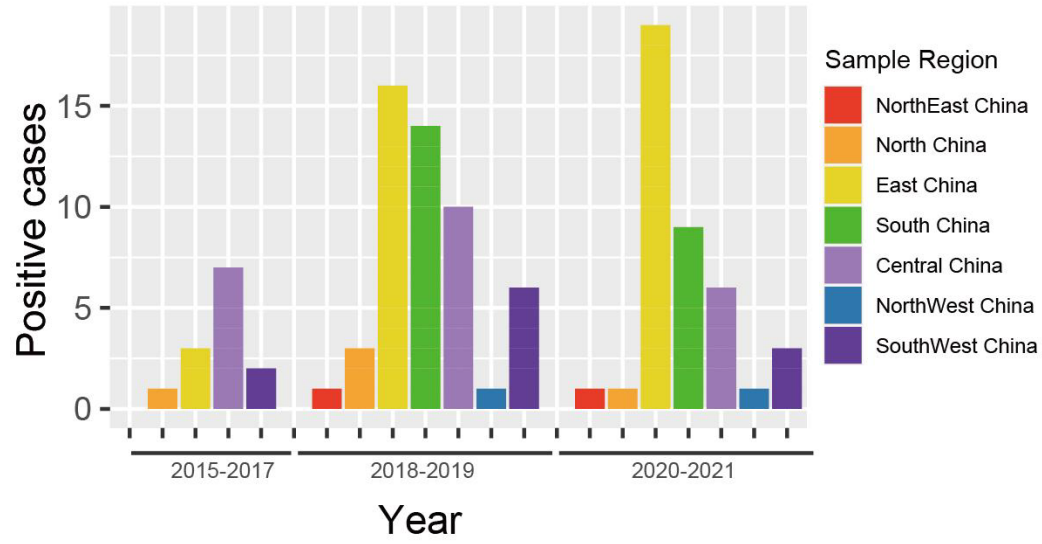

B

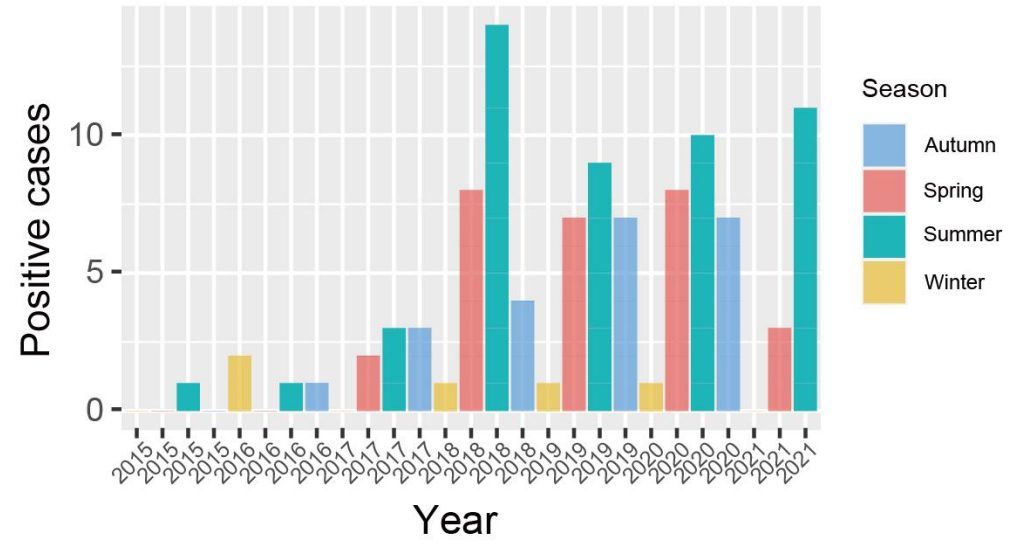

Figure S3

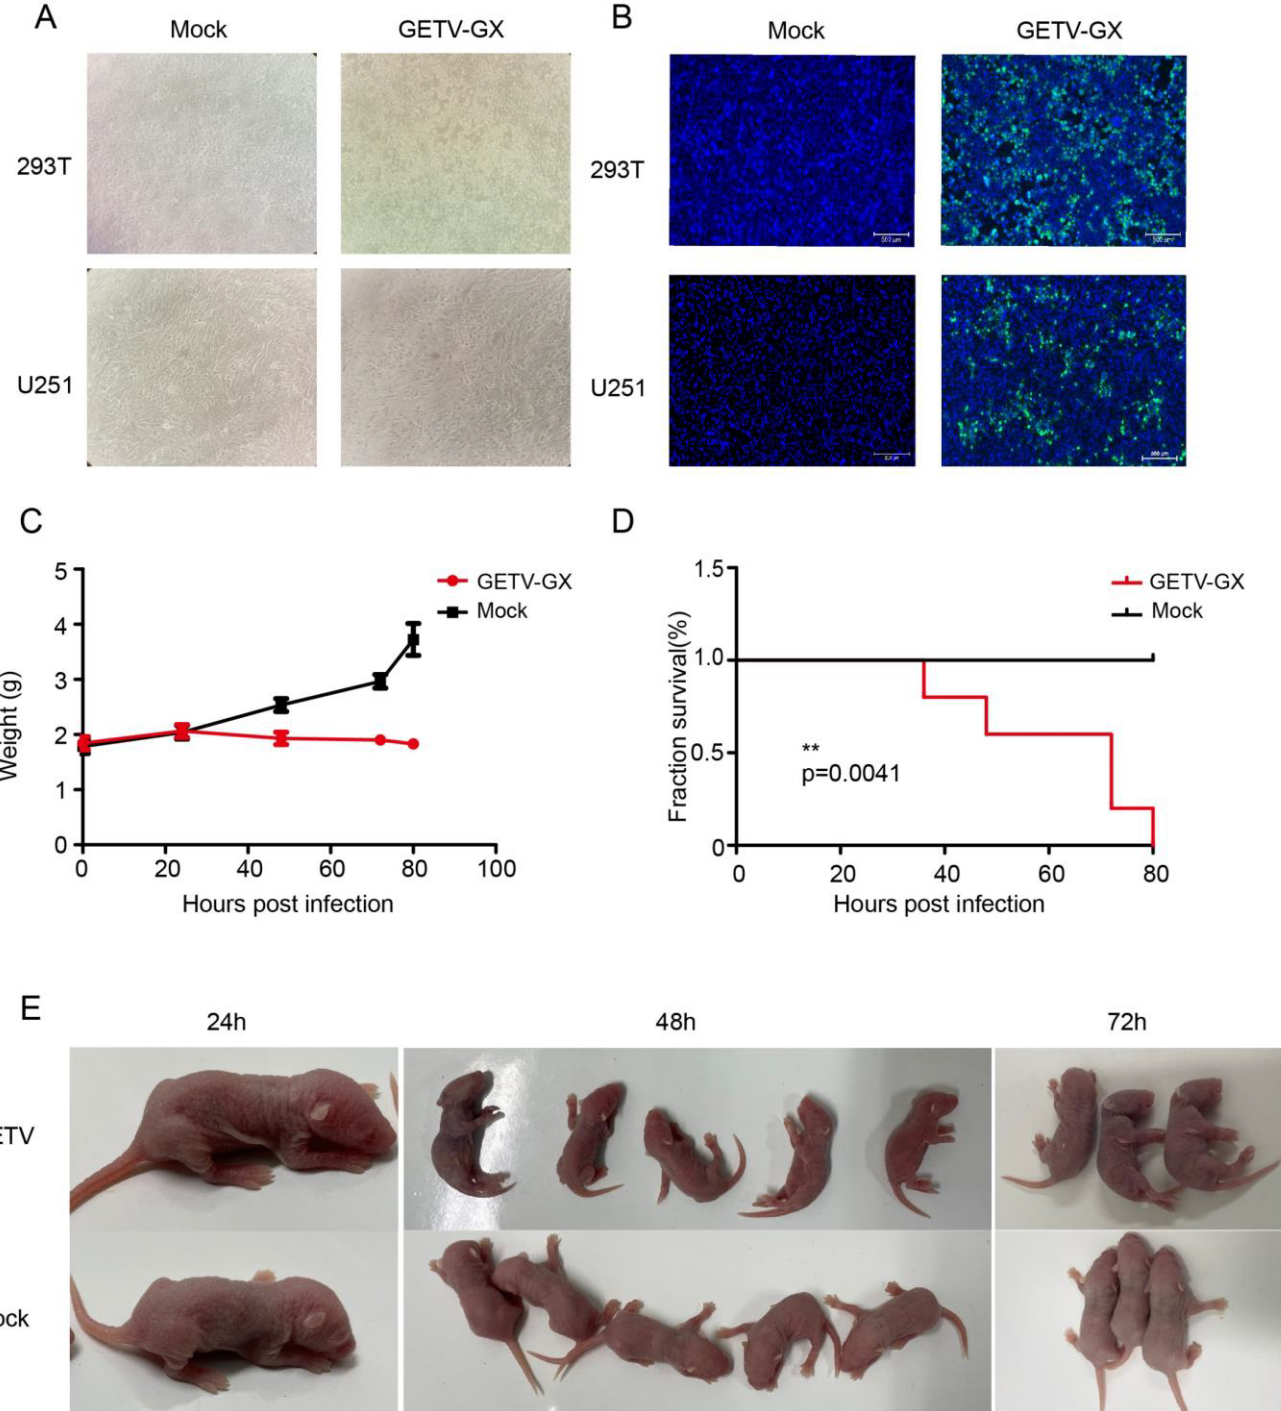

Figure S4

A

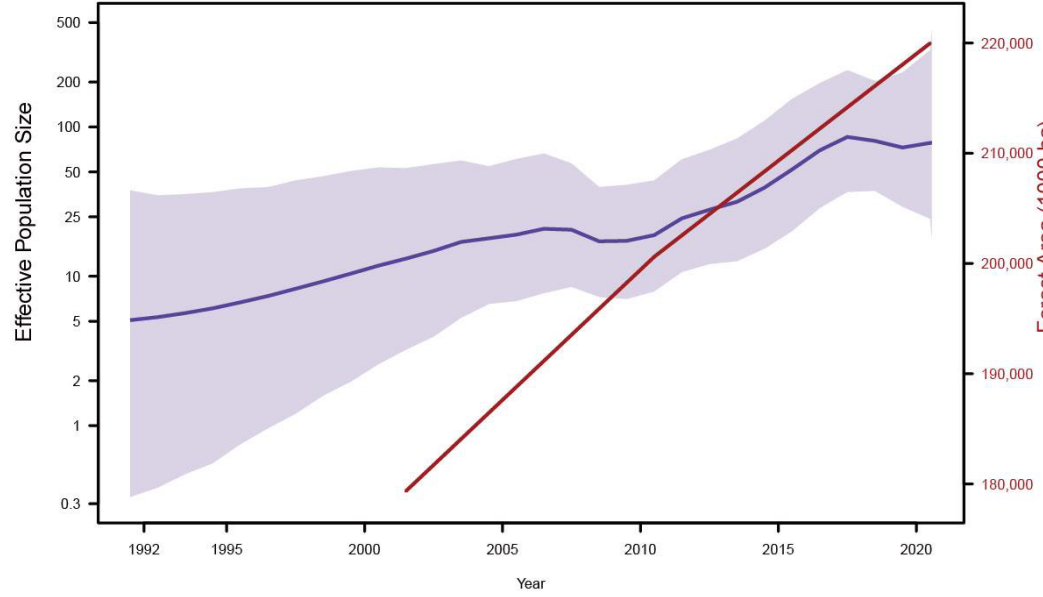

C

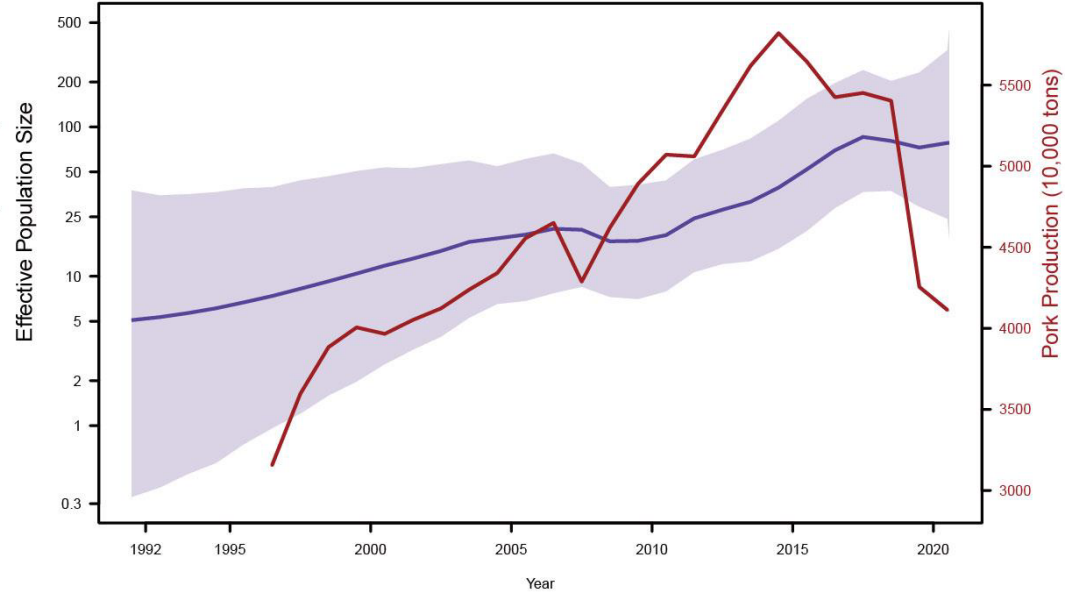

B

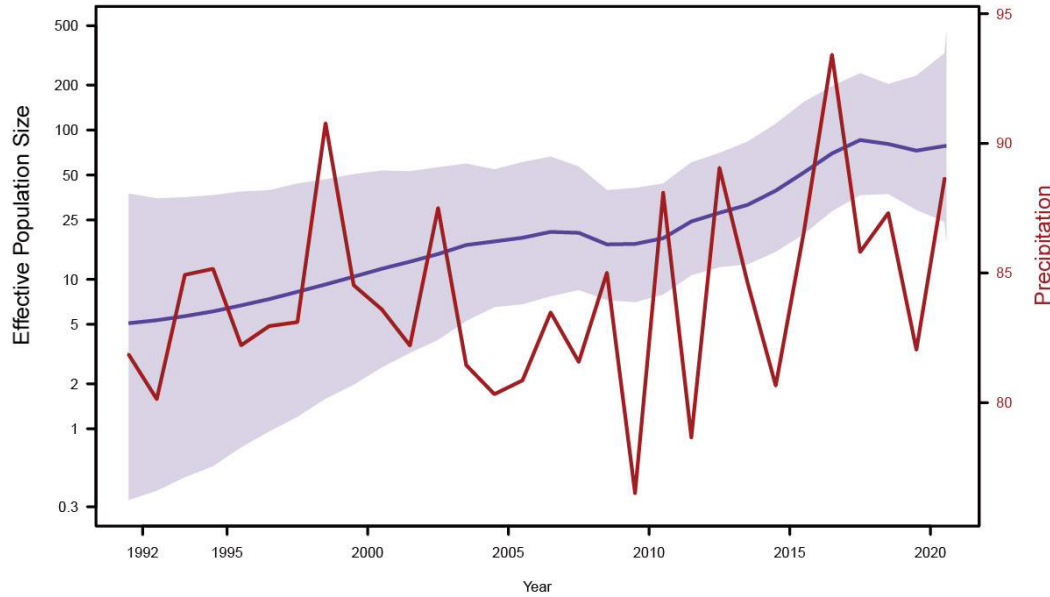

D

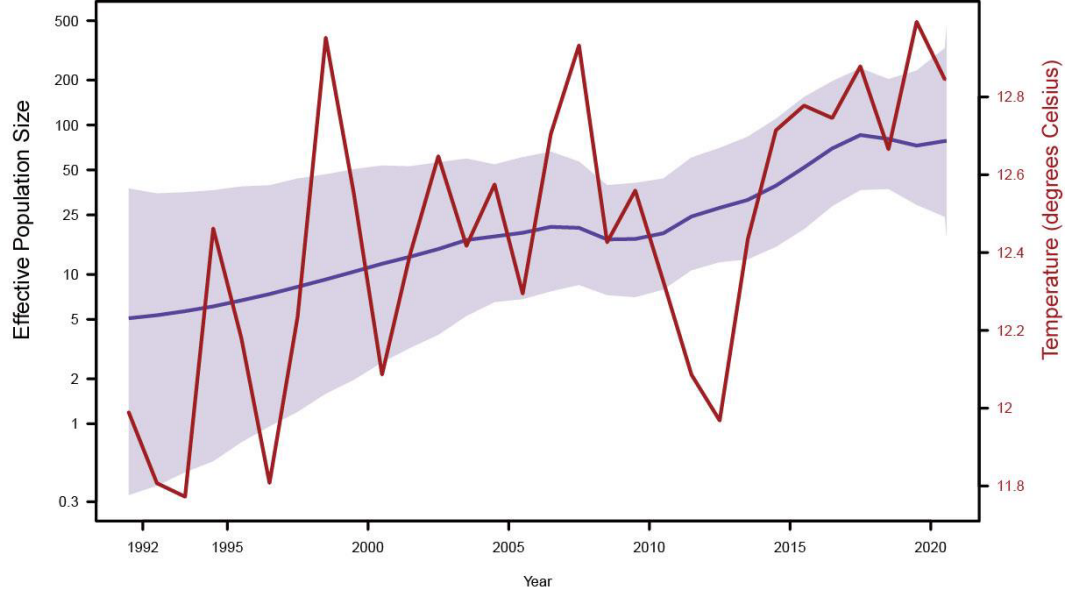

Figure S5

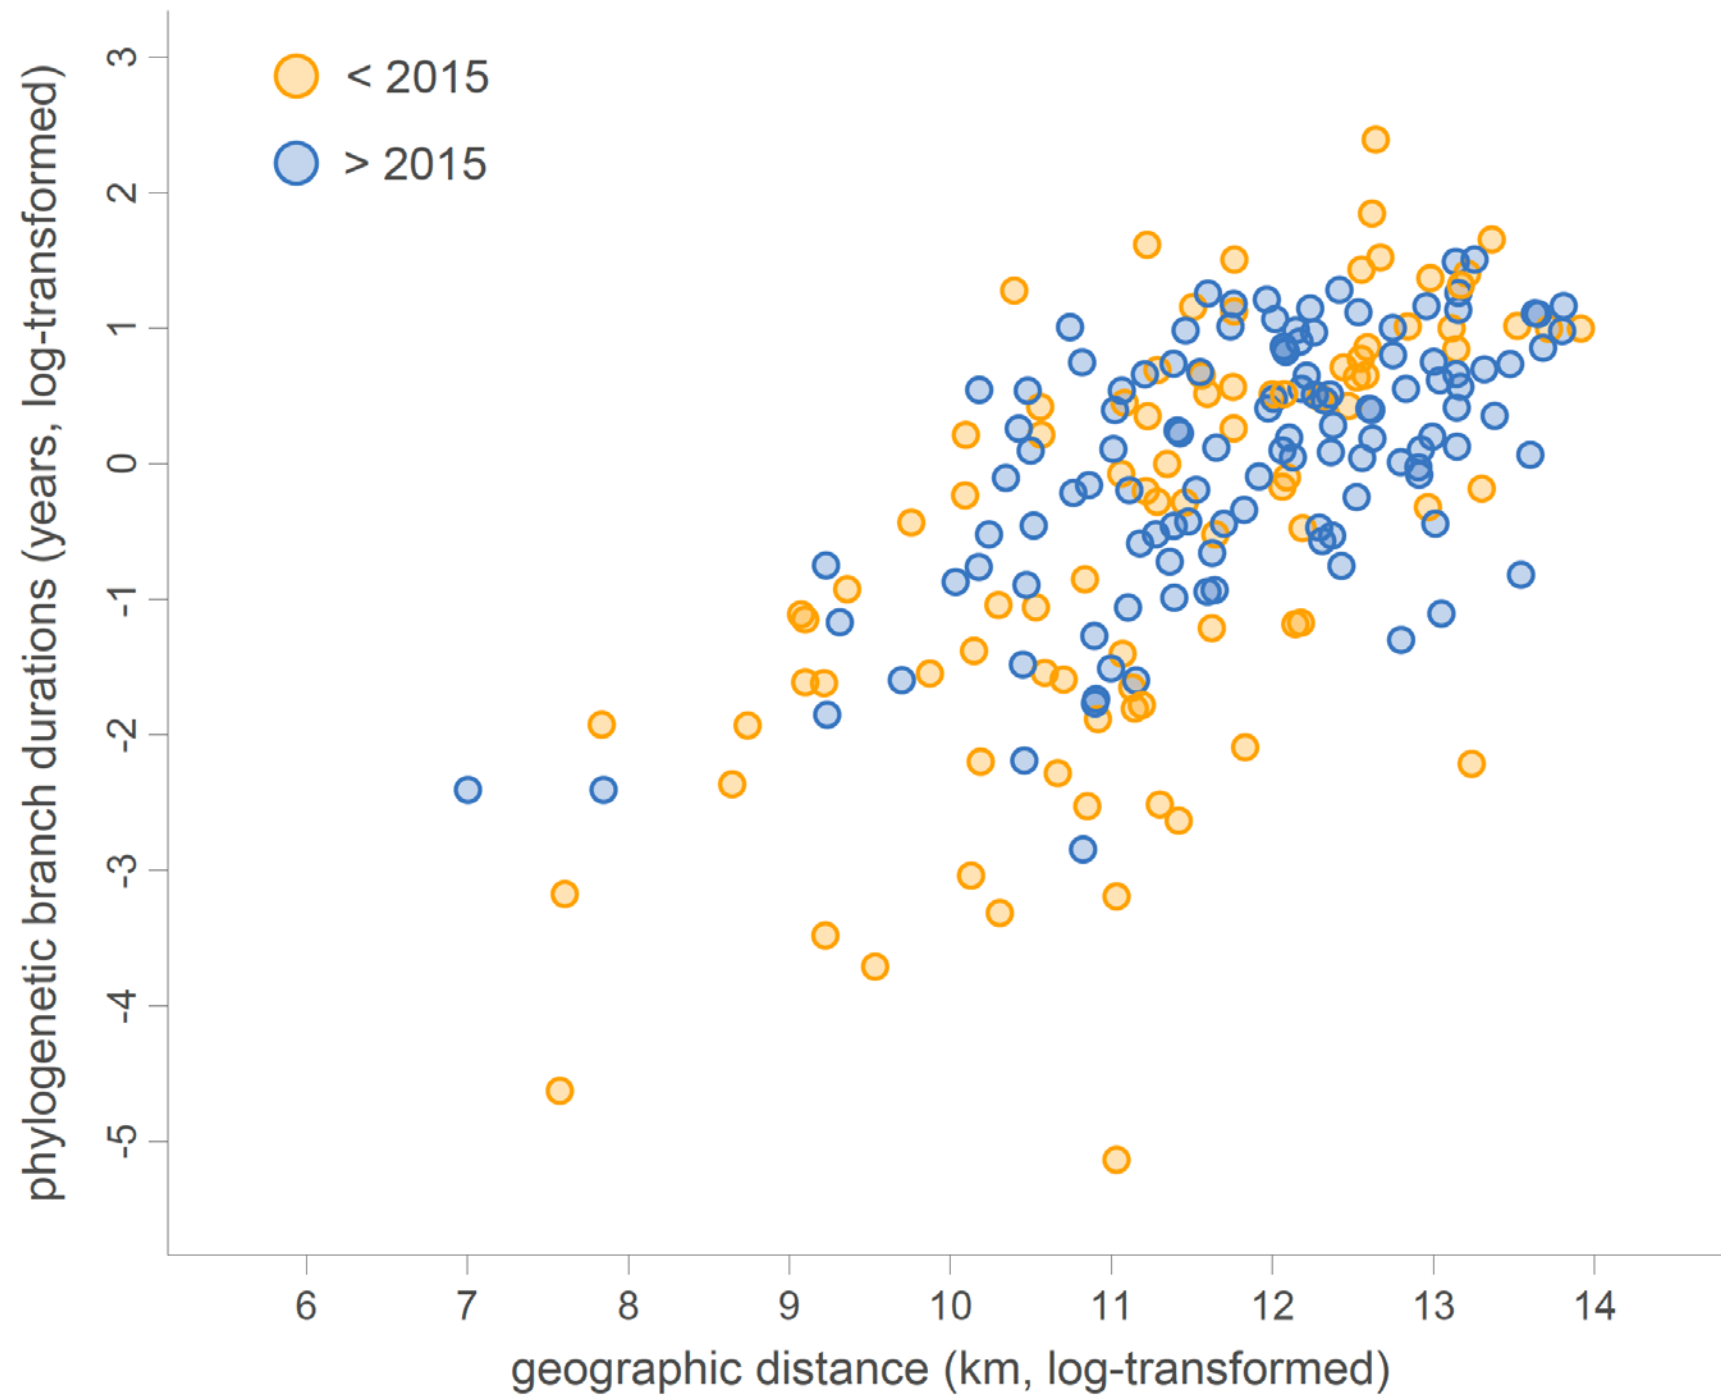

Source: https://www.biorxiv.org/content/10.1101/2022.03.11.483952v1.full.pdf
